# Supplementary material for: Oxidative cascade cyclization of N-arylacrylamides with TMSN3
Source: Royal Society of Chemistry journal article supplement (doi:10.1039/d3ob01951a), 2024-01-01

## Supporting Information

### Oxidative cascade cyclization of *N*-arylacrylamides with TMSN<sub>3</sub>

Bo Jiang, Tai-Gang Fan, Yu-Song Ran, Yun-Tao Shen, Cui Zhang, Wei Jiang, and Ya-Min Li\*

*Faculty of Life Science and Technology, Kunming University of Science and Technology, Kunming 650500, P. R. China. E-mail: liym@kust.edu.cn*

#### Table of Contents

|                         |    |
|-------------------------|----|
| 1. Gram-scale synthesis | S2 |
| 2. Charts of compounds  | S3 |

## 1. Gram-scale synthesis

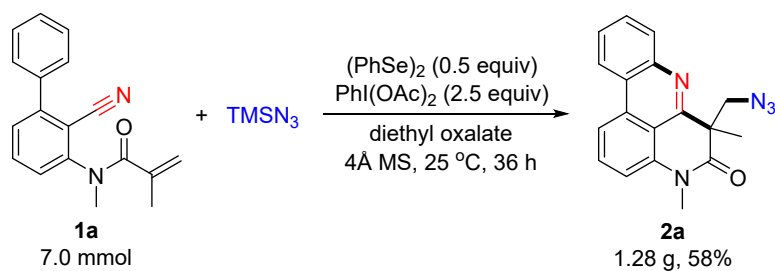

In a 250 mL oven-dried flask, acrylamide **1a** (7.0 mmol),  $(\text{PhSe})_2$  (3.5 mmol, 1.09 g),  $\text{PhI}(\text{OAc})_2$  (17.5 mmol, 5.64 g) and 4Å MS (5.2 g) were added and charged with argon three times. Then, diethyl oxalate (105.0 mL) was added. After stirring at 25 °C for 30 minutes,  $\text{TMSN}_3$  (24.5 mmol, 2.82 g) was added dropwise. The mixture was allowed to stir at 25 °C for 36 hours. After the reaction was complete, the mixture was concentrated by rotary evaporation and purified by flash chromatography on silica gel with petroleum ether/ethyl acetate (15/1, v/v) as the eluent to afford the corresponding product **2a** with 58% yield (1.28 g).

## 2. Charts of compounds

$^1\text{H}$  NMR, 600 MHz,  $\text{CDCl}_3$

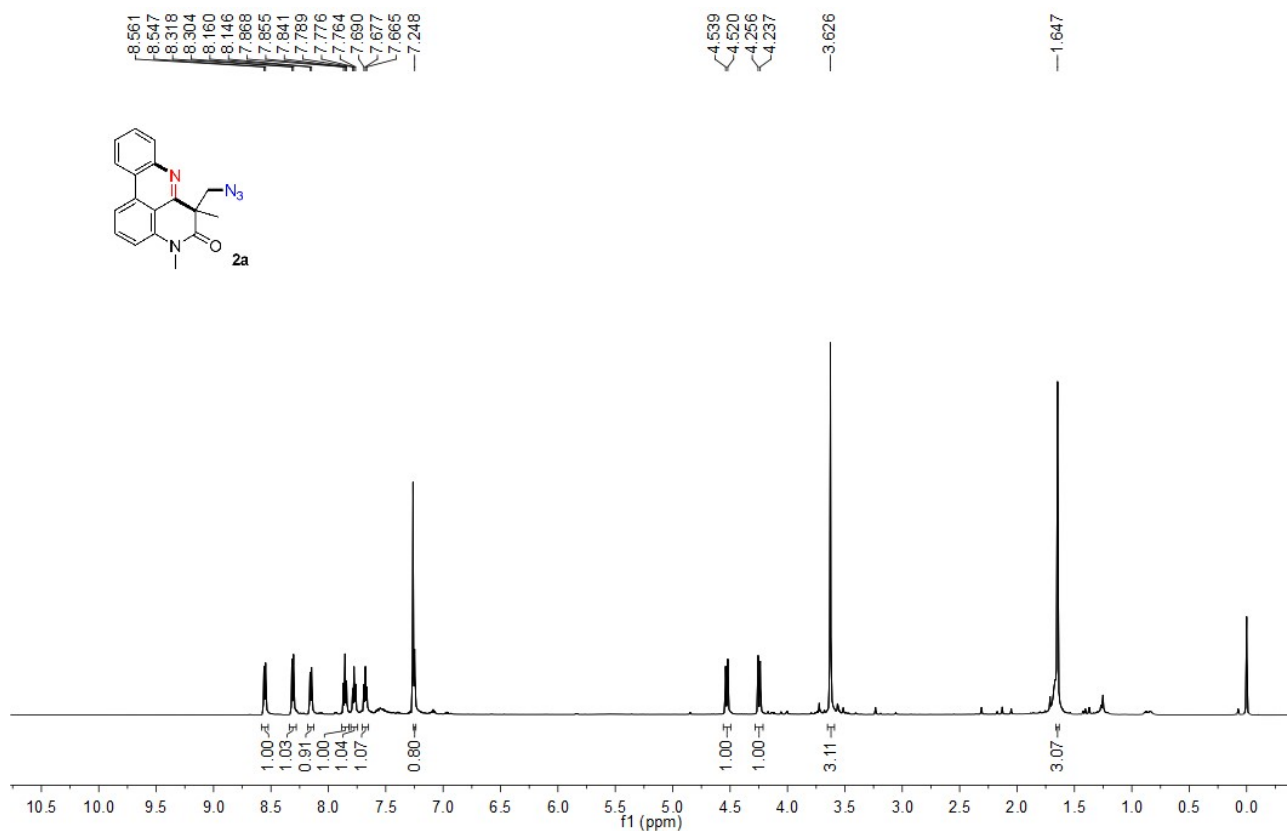

$^{13}\text{C}$  NMR (151 MHz,  $\text{CDCl}_3$ )

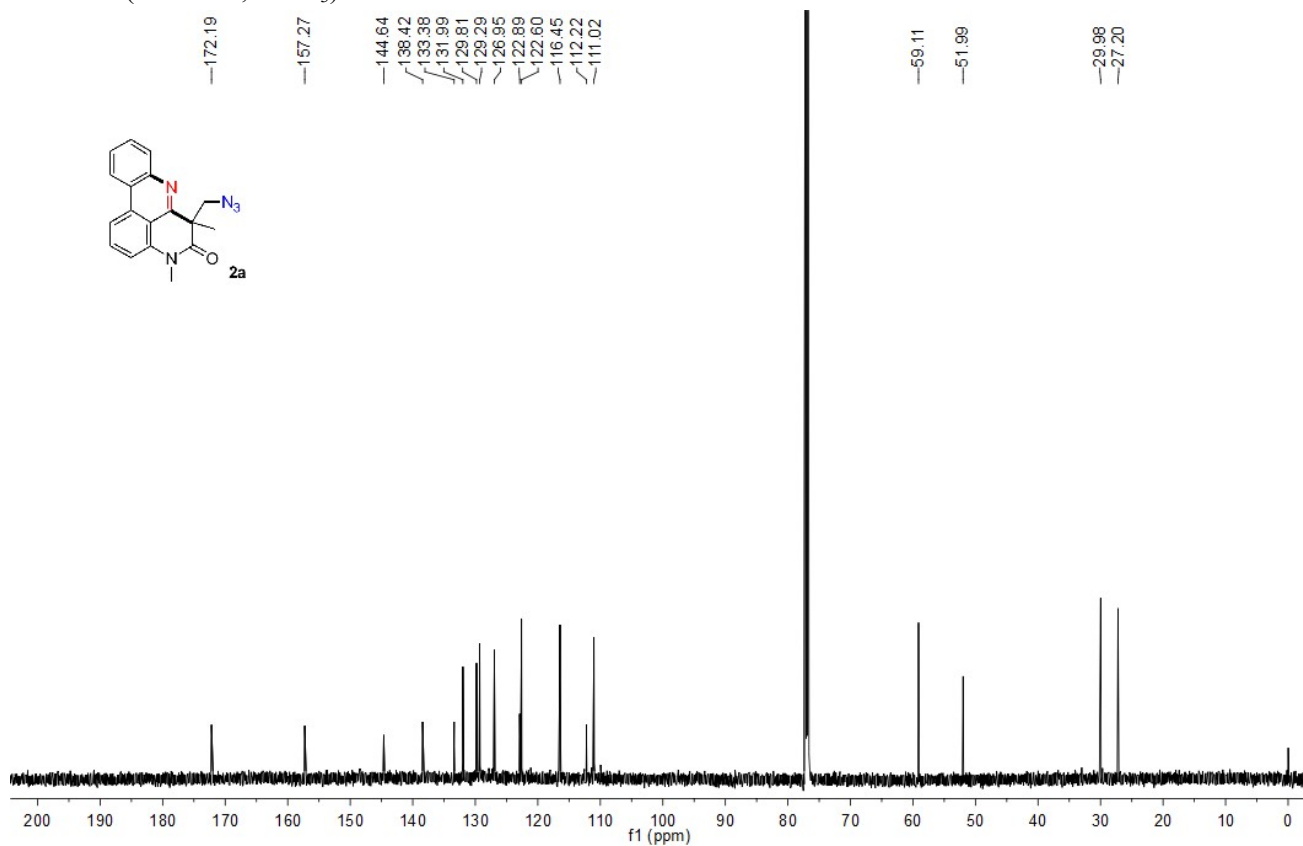

<sup>1</sup>H NMR, 500 MHz, CDCl<sub>3</sub>

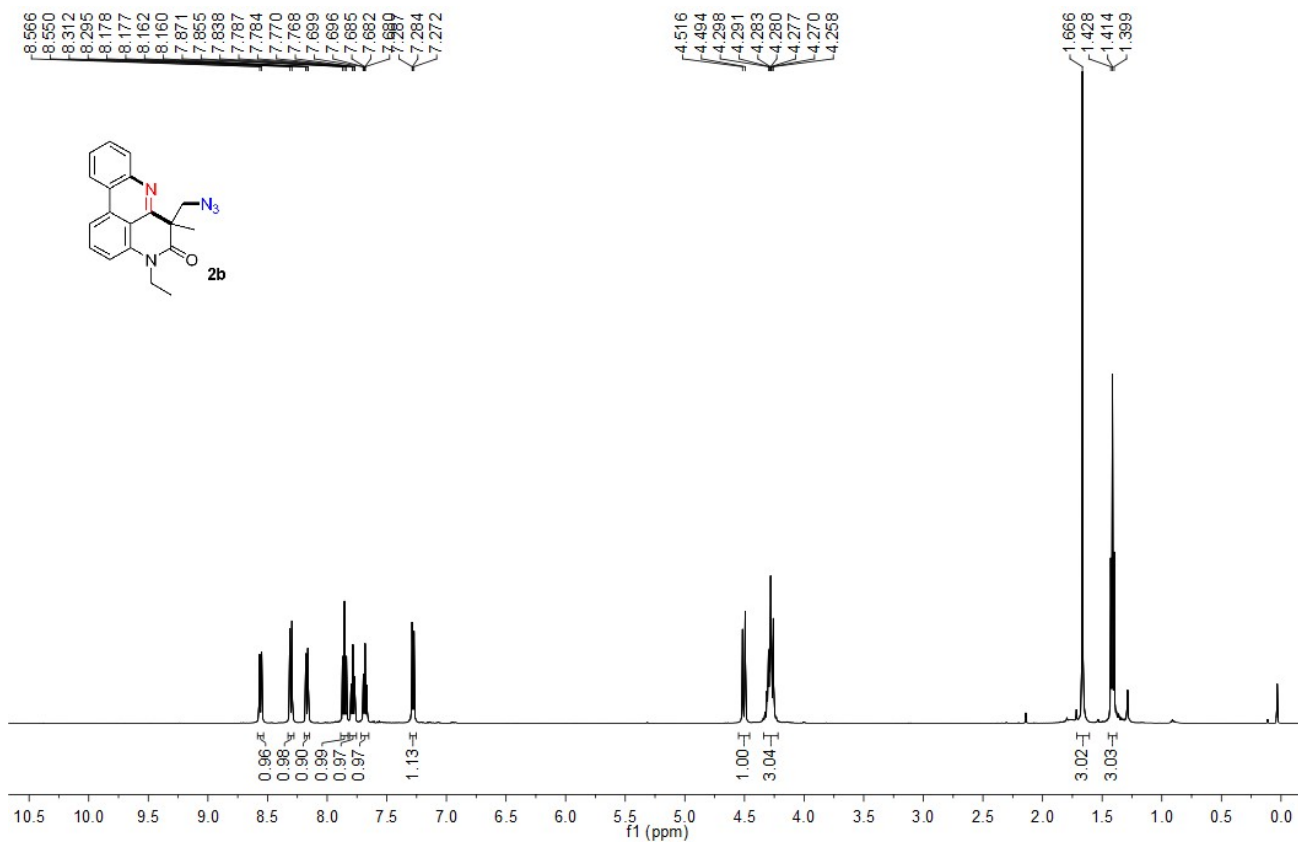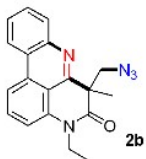

<sup>13</sup>C NMR (126 MHz, CDCl<sub>3</sub>)

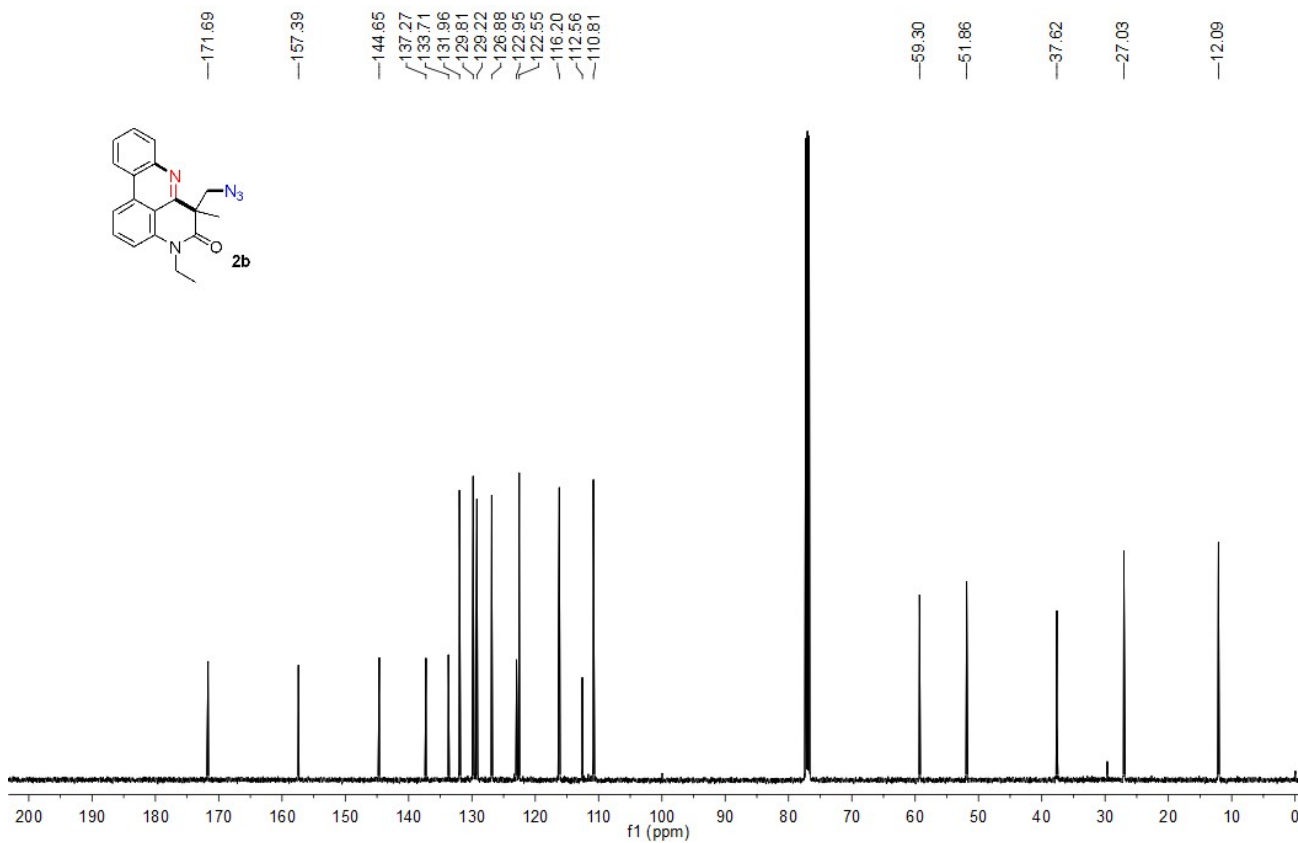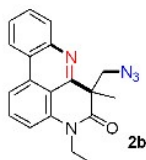

$^1\text{H}$  NMR, 600 MHz,  $\text{CDCl}_3$

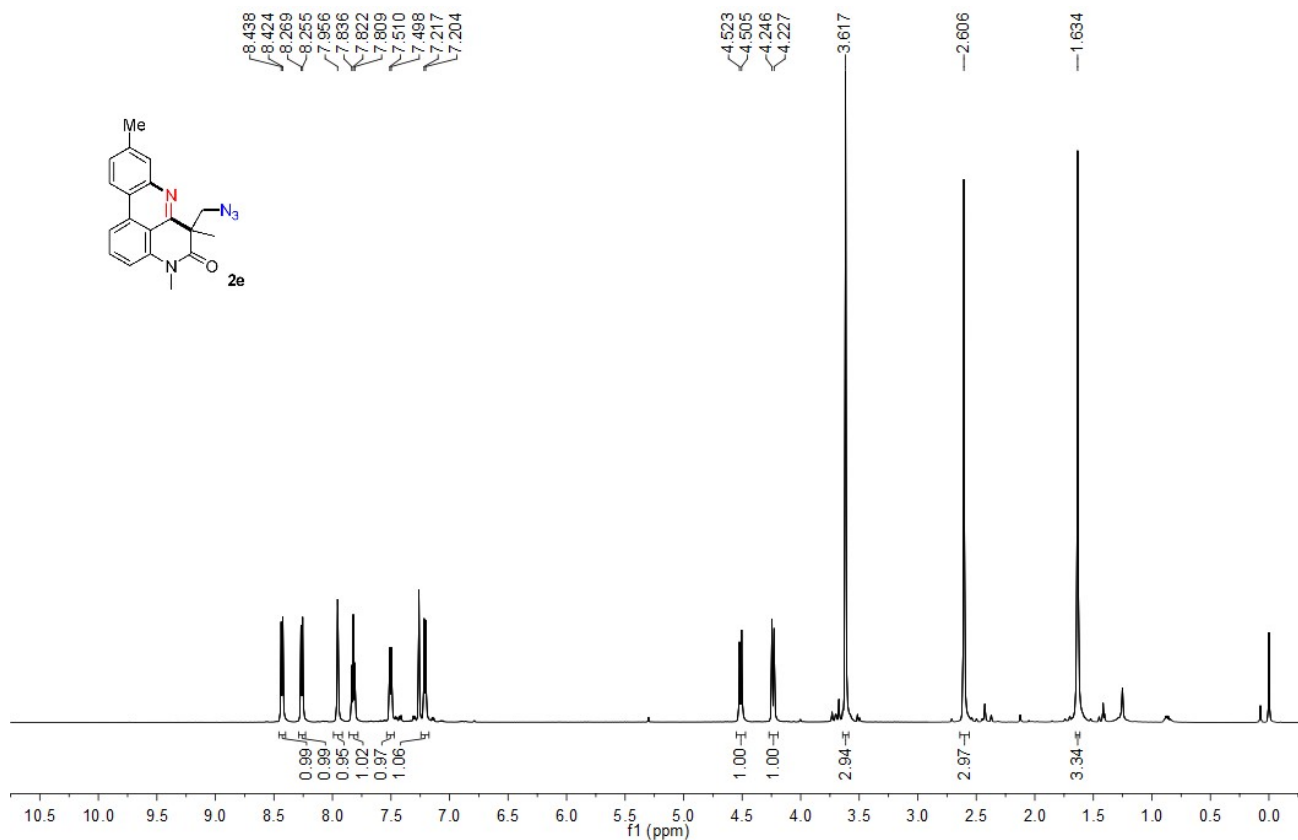

$^{13}\text{C}$  NMR (151 MHz,  $\text{CDCl}_3$ )

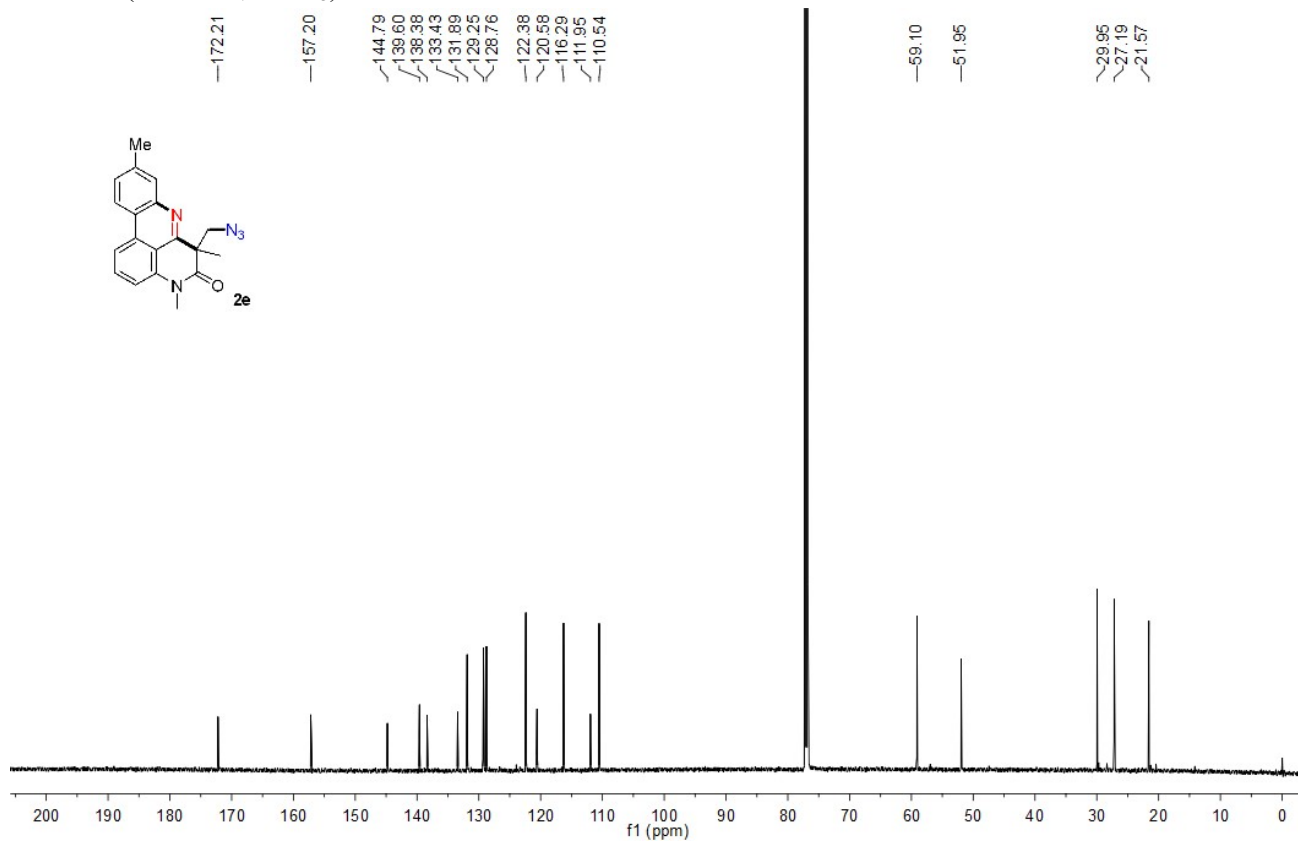

$^1\text{H}$  NMR, 600 MHz,  $\text{CDCl}_3$

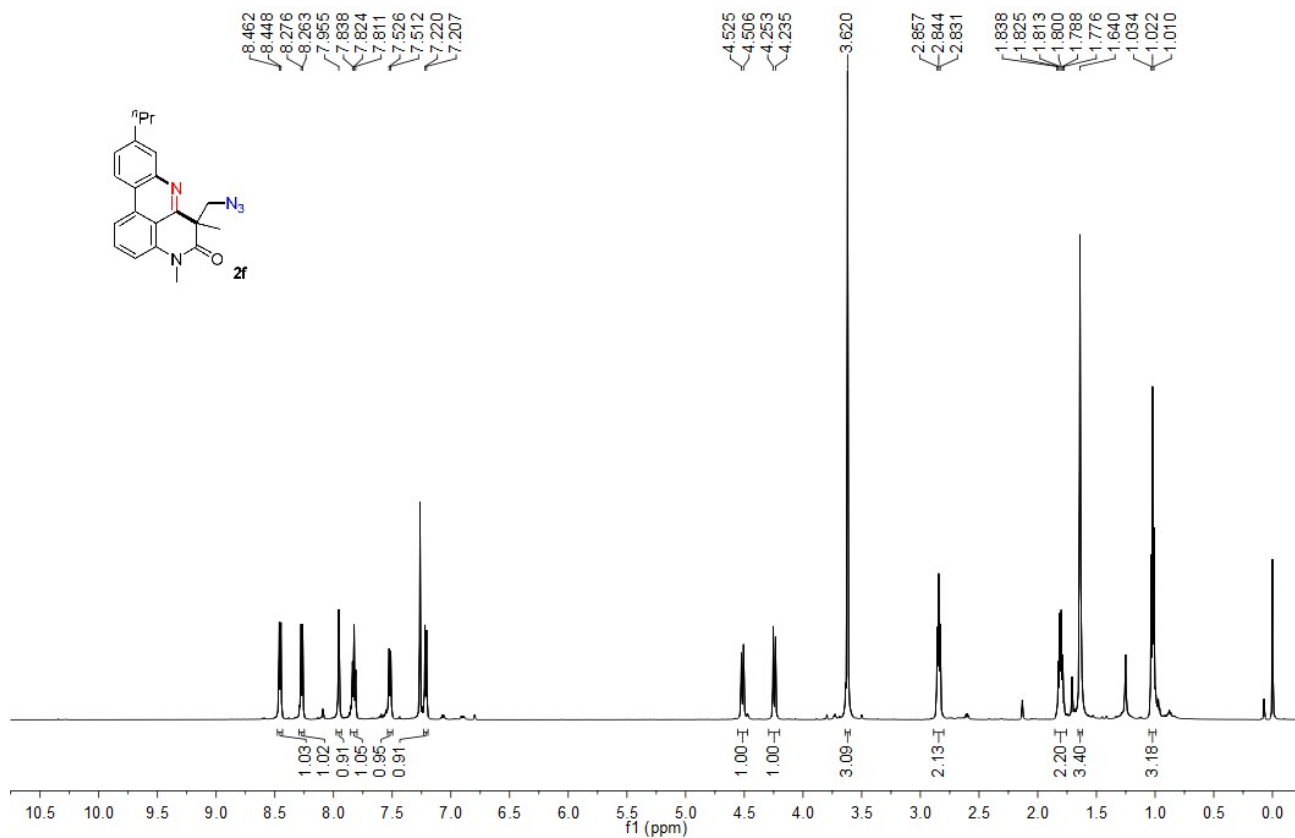

$^{13}\text{C}$  NMR (151 MHz,  $\text{CDCl}_3$ )

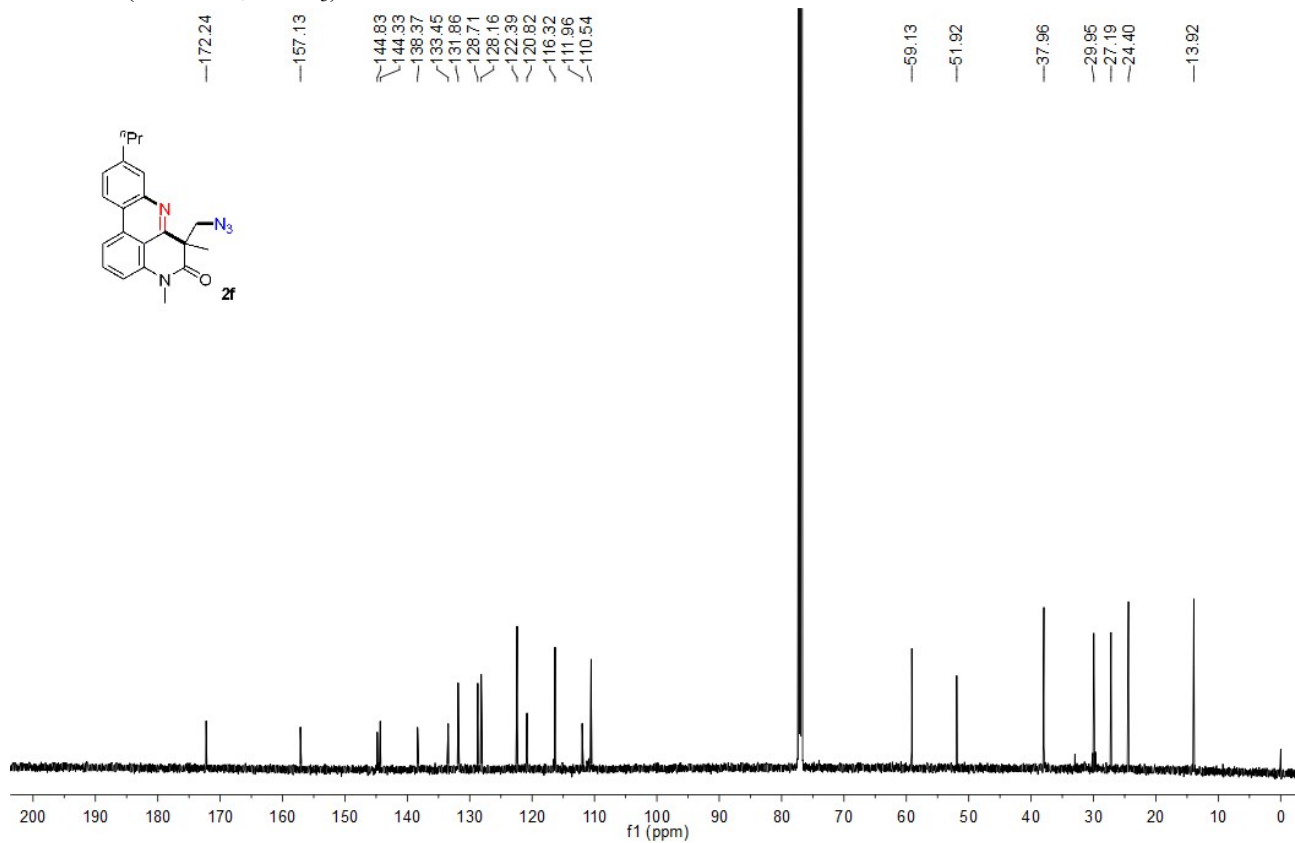

<sup>1</sup>H NMR, 600 MHz, CDCl<sub>3</sub>

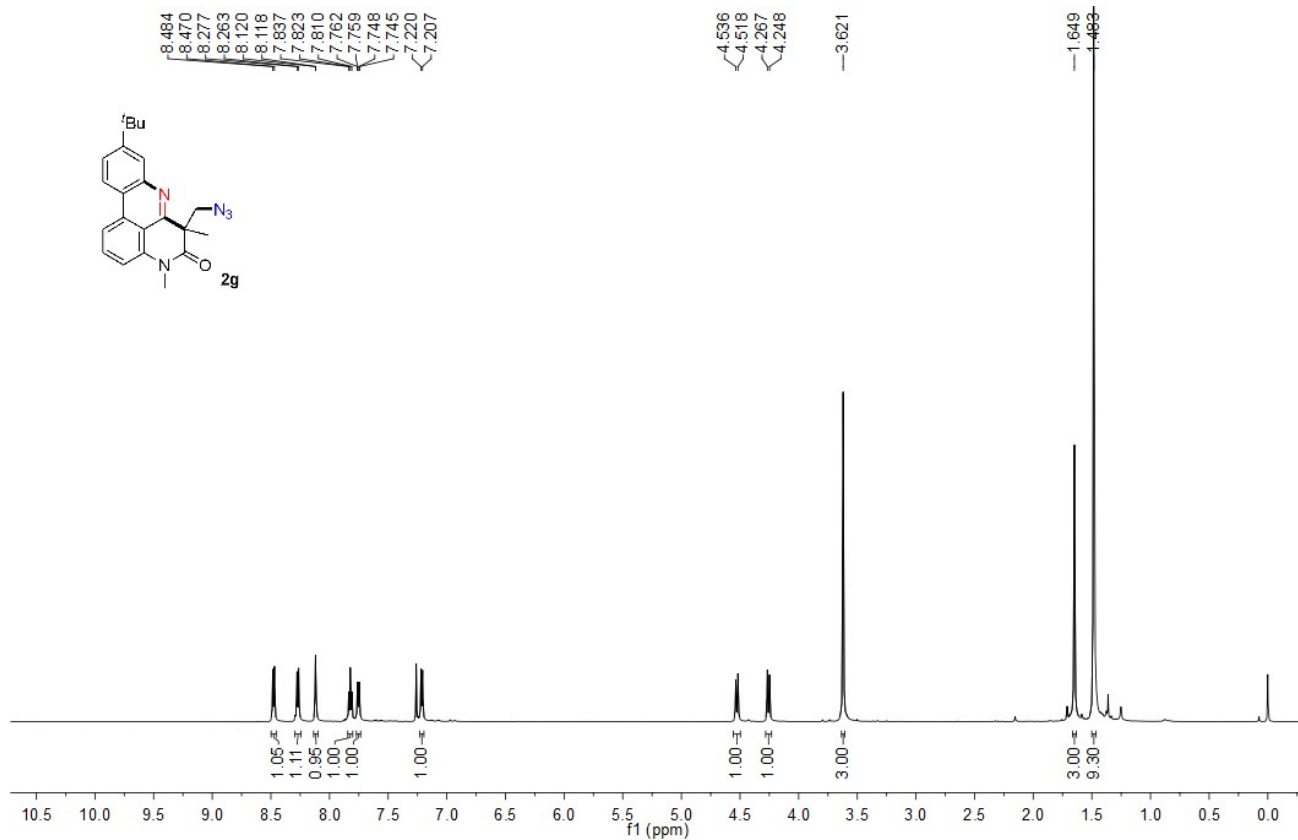

<sup>13</sup>C NMR (151 MHz, CDCl<sub>3</sub>)

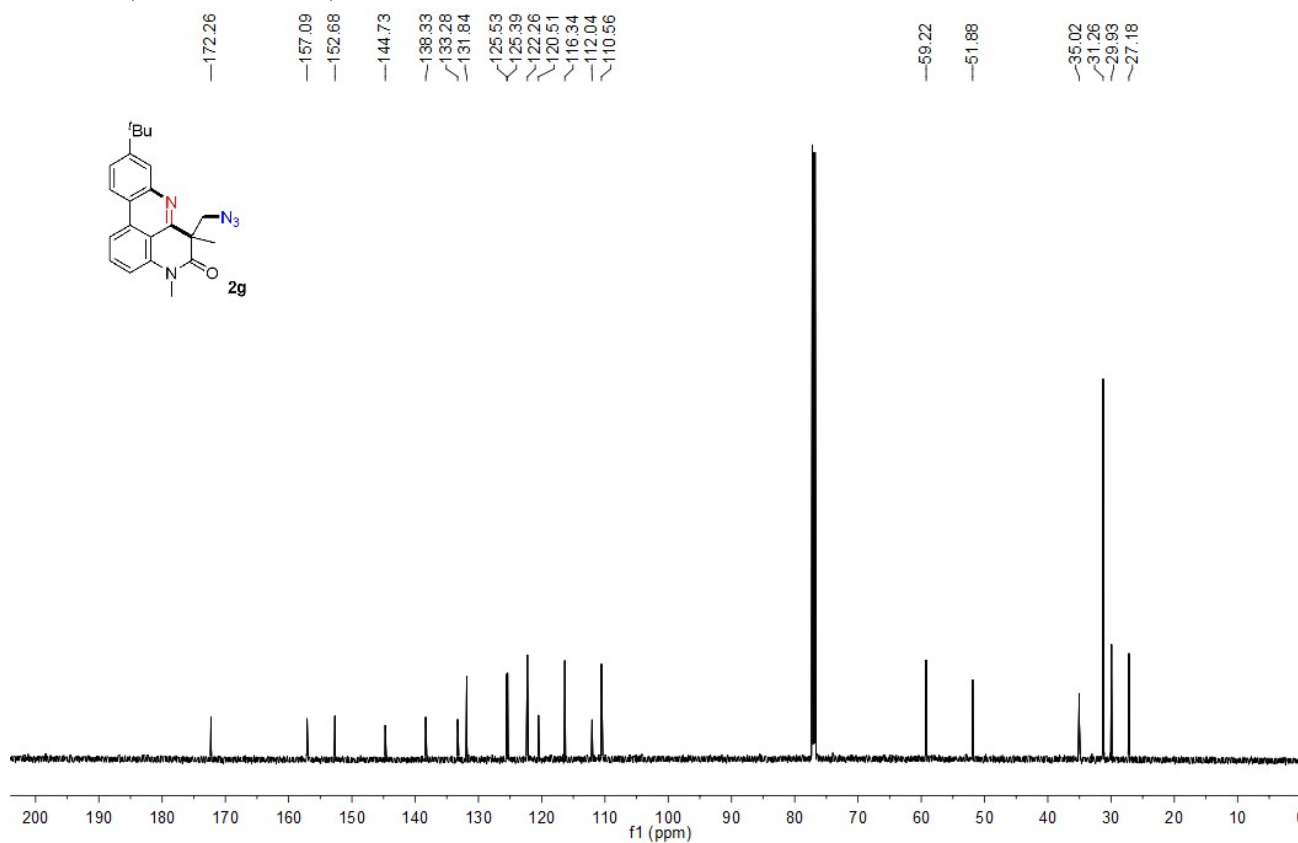

$^1\text{H}$  NMR, 600 MHz,  $\text{CDCl}_3$

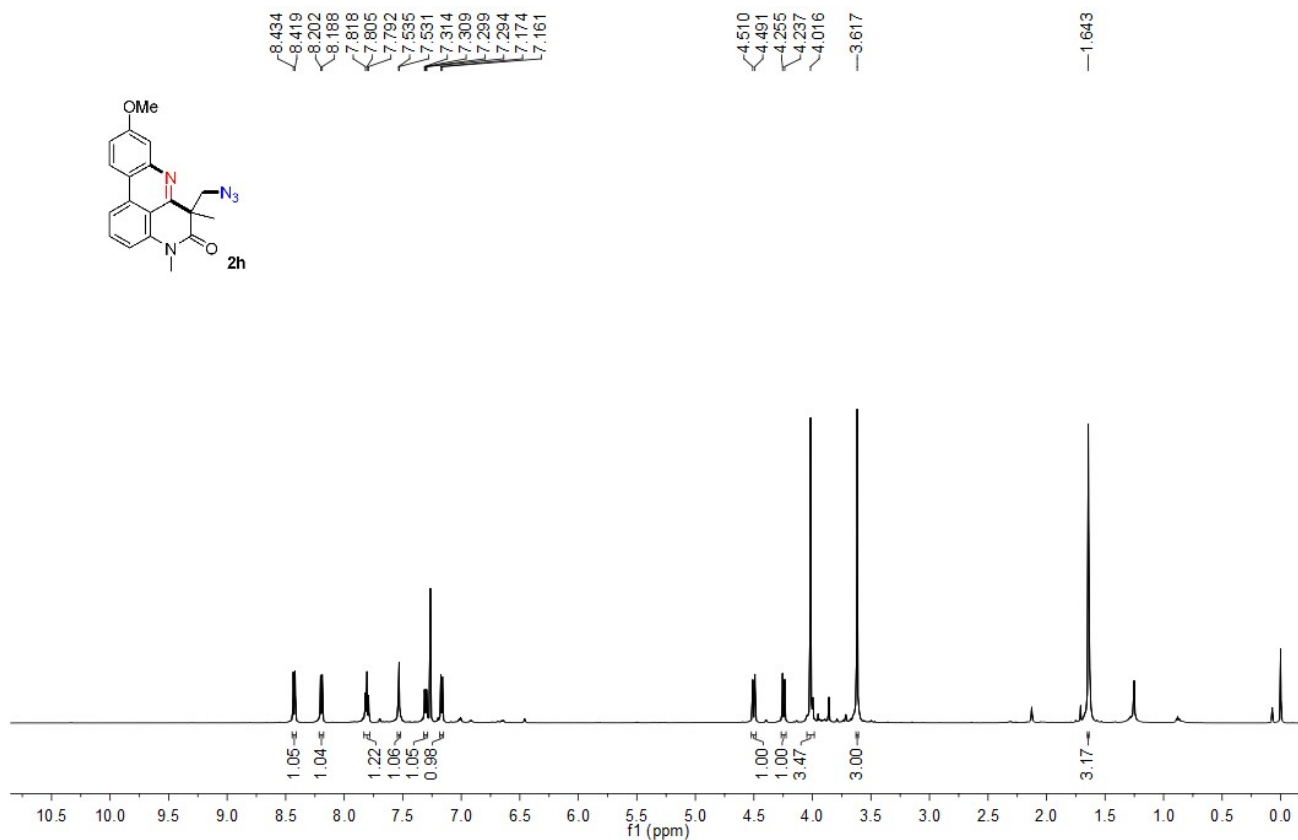

$^{13}\text{C}$  NMR (151 MHz,  $\text{CDCl}_3$ )

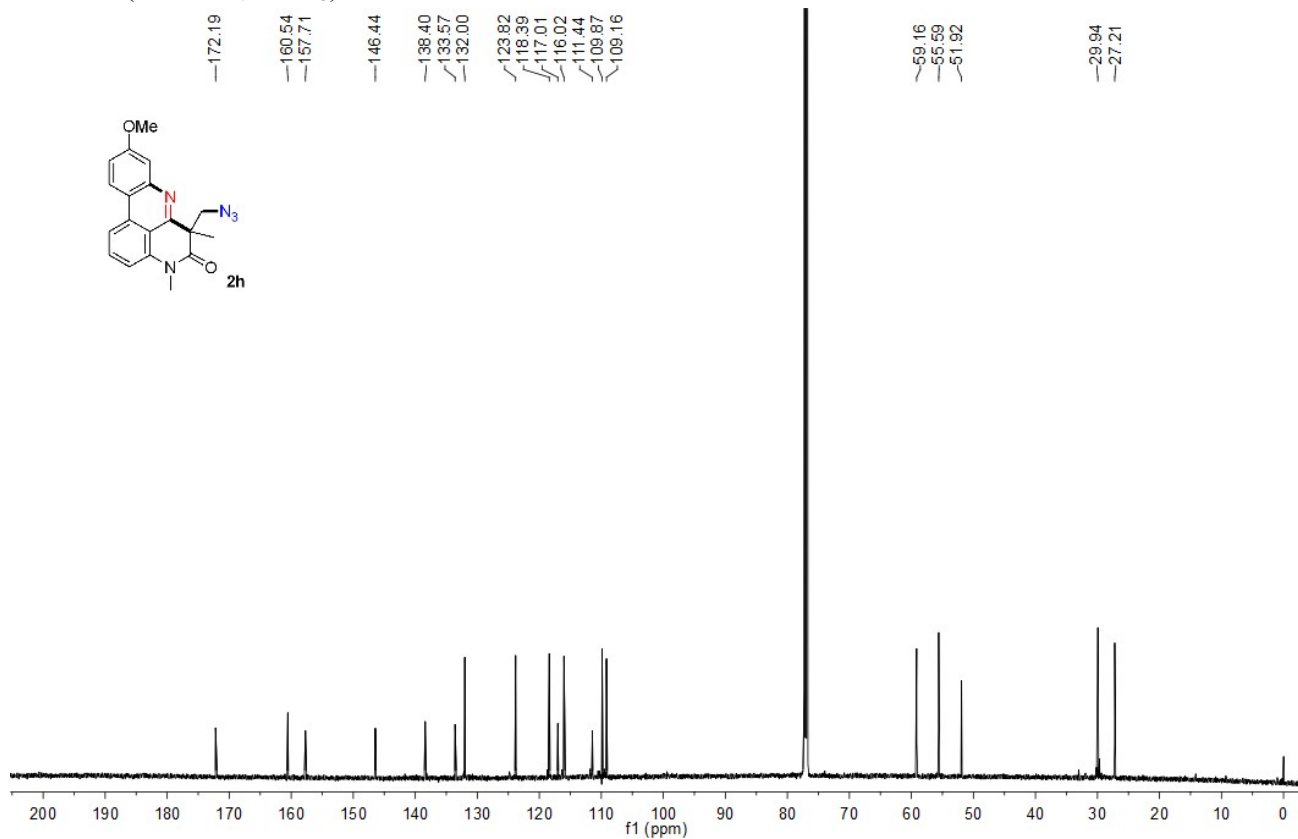



<sup>1</sup>H NMR, 600 MHz, CDCl<sub>3</sub>

8.511  
8.496  
8.226  
8.212  
7.840  
7.827  
7.813  
7.580  
7.576  
7.448  
7.435  
7.421  
7.417  
7.234  
7.221  
7.206  
7.193  
7.181  
7.168

4.446  
4.427  
4.214  
4.195

3.613

1.612

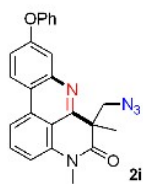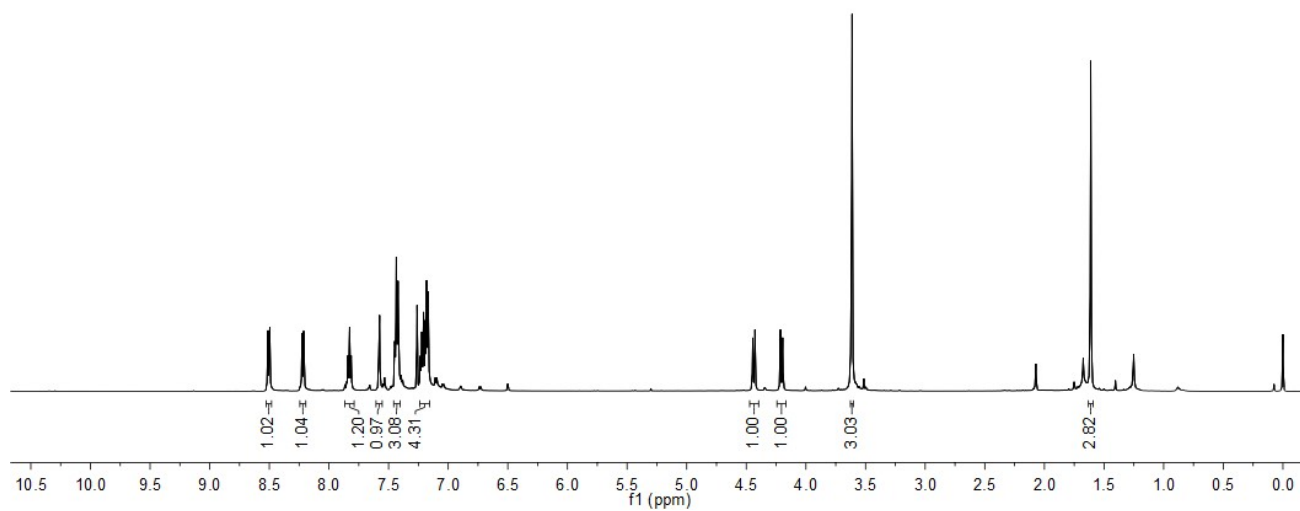

<sup>13</sup>C NMR (151 MHz, CDCl<sub>3</sub>)

172.14  
158.68  
158.12  
156.17  
146.10  
138.47  
133.36  
132.17  
130.01  
124.25  
124.20  
119.97  
119.38  
118.57  
116.14  
115.70  
111.68  
110.37

69.19

51.93

29.94  
27.12

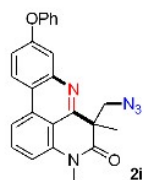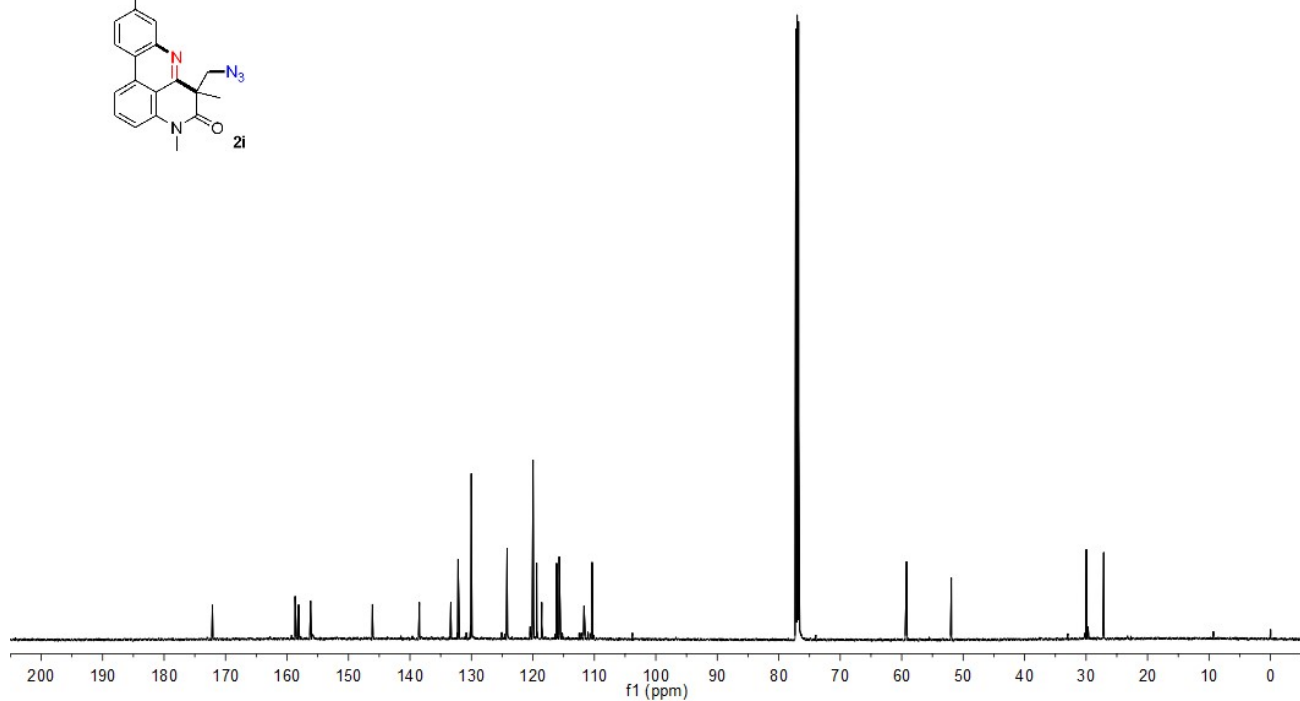

<sup>1</sup>H NMR, 500 MHz, CDCl<sub>3</sub>

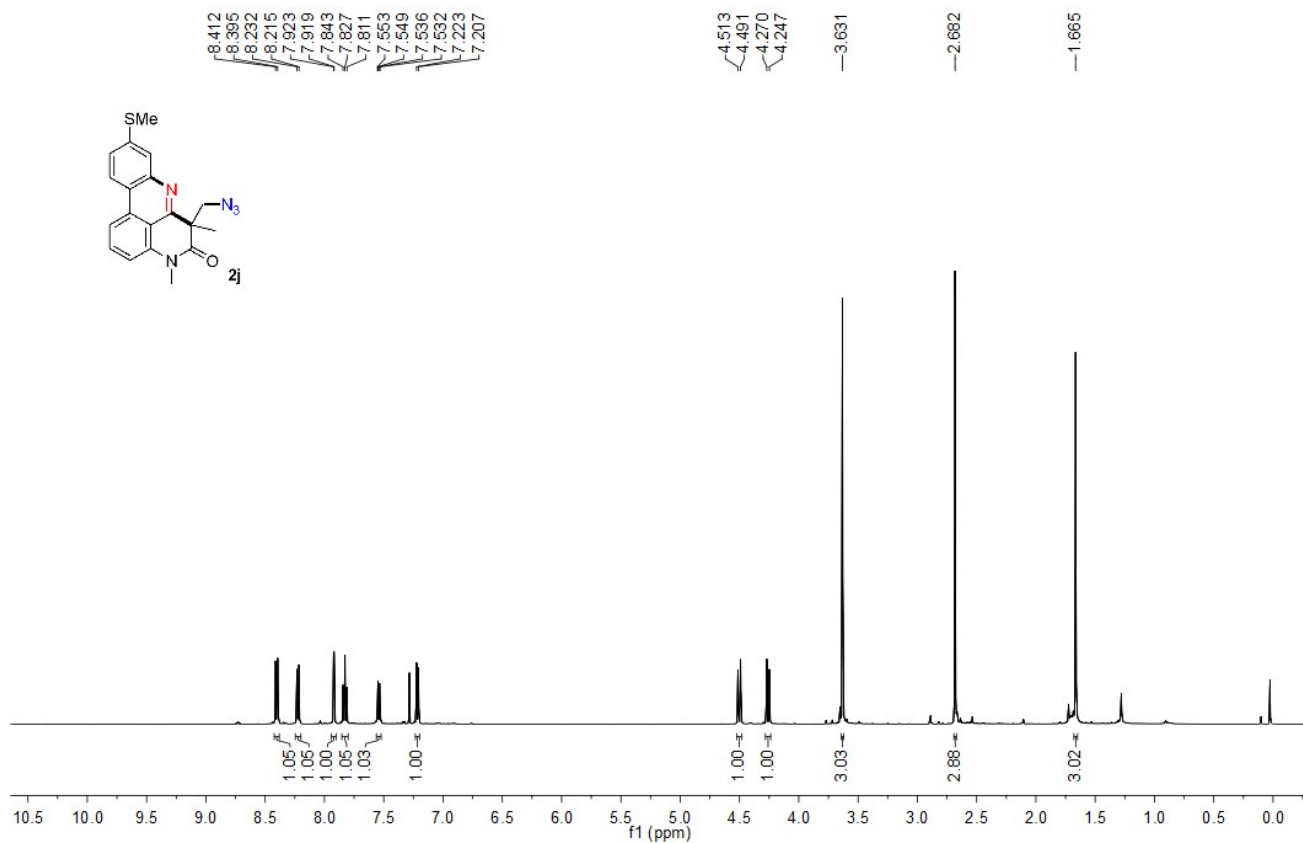

<sup>13</sup>C NMR (126 MHz, CDCl<sub>3</sub>)

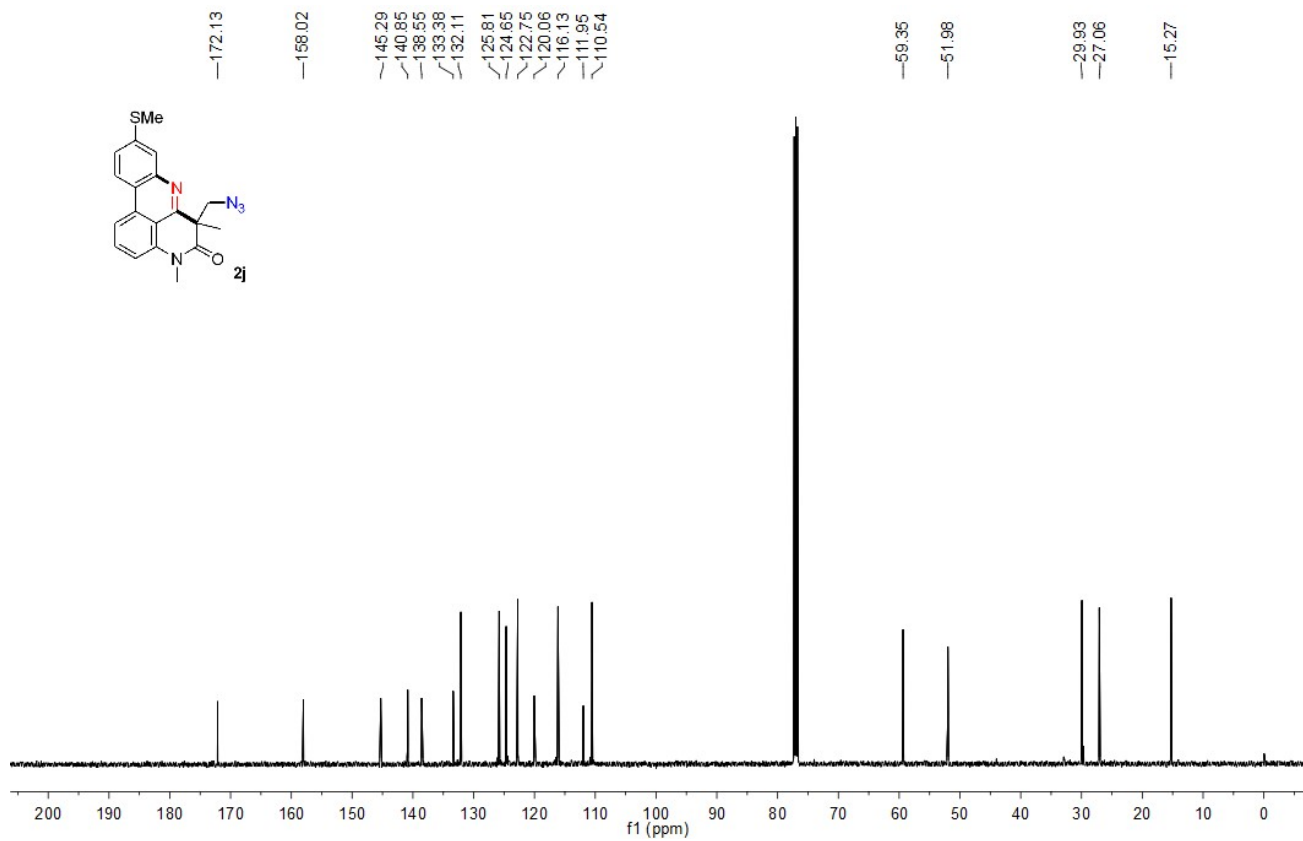

$^1\text{H}$  NMR, 600 MHz,  $\text{CDCl}_3$

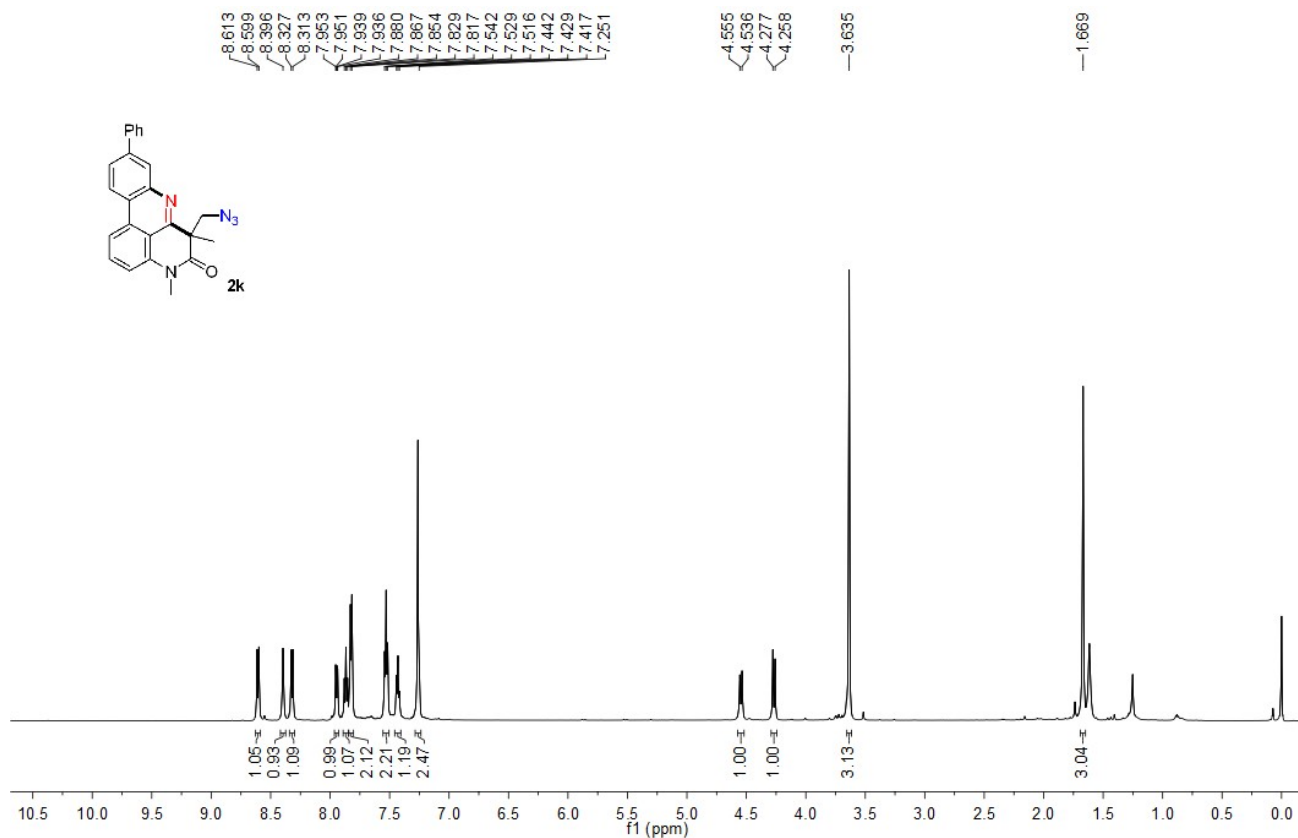

$^{13}\text{C}$  NMR (151 MHz,  $\text{CDCl}_3$ )

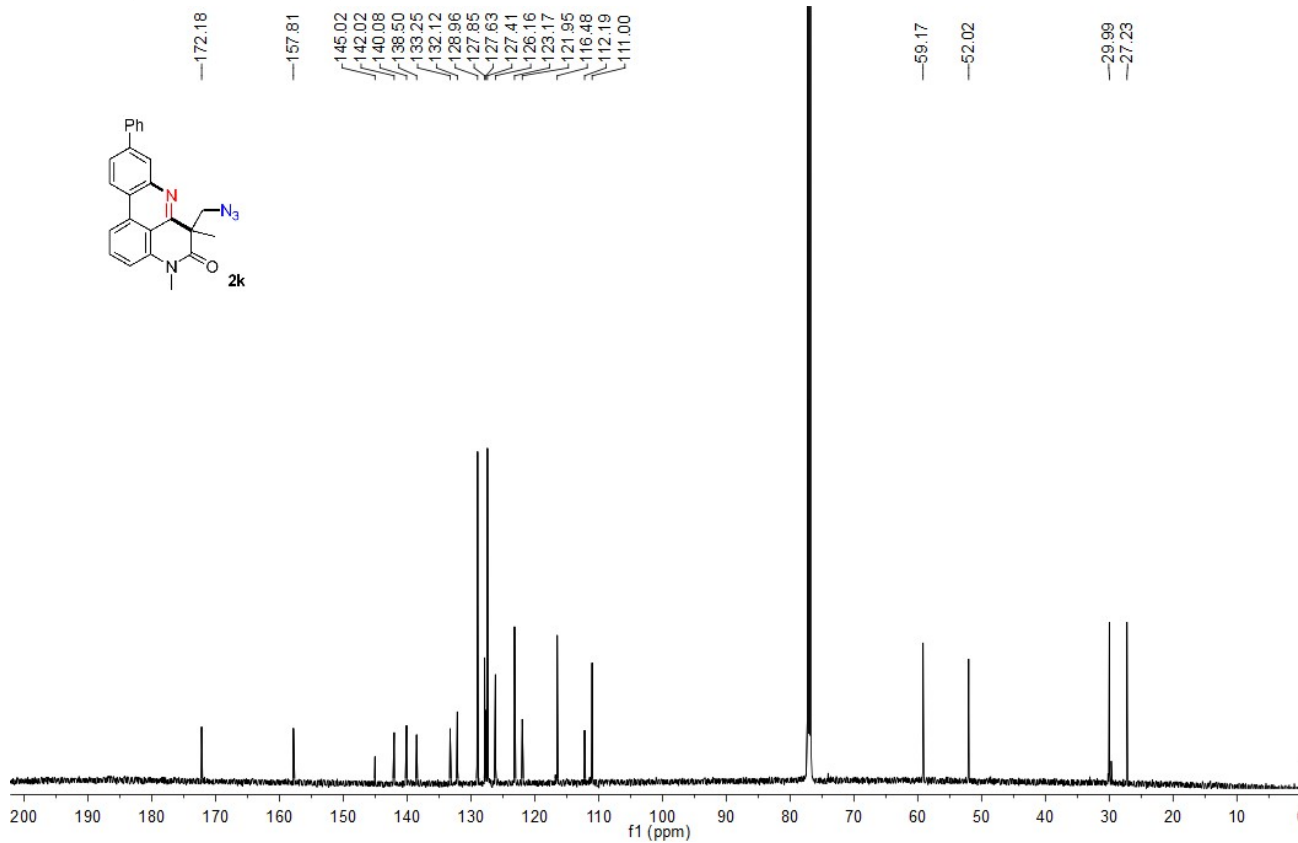

$^1\text{H}$  NMR, 600 MHz,  $\text{CDCl}_3$

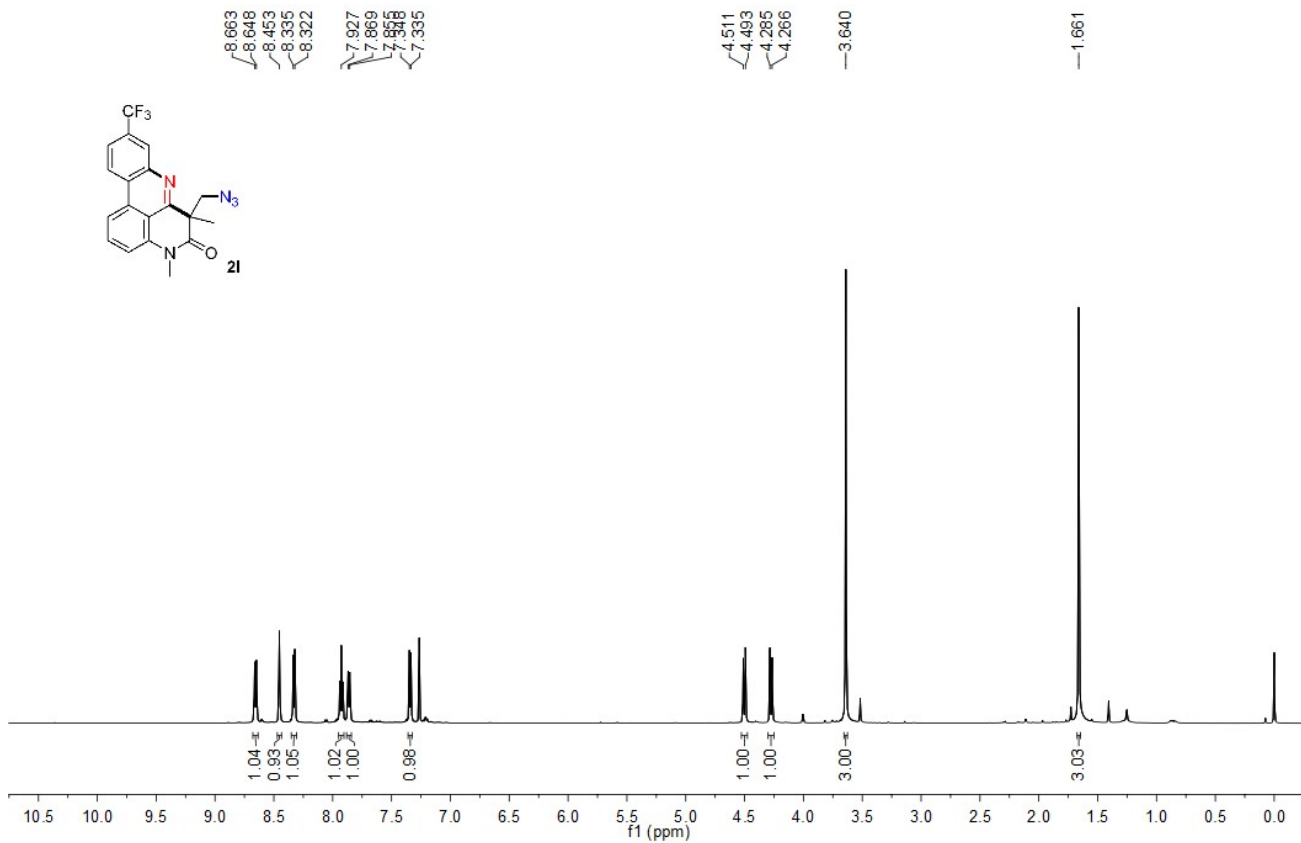

$^{13}\text{C}$  NMR (151 MHz,  $\text{CDCl}_3$ )

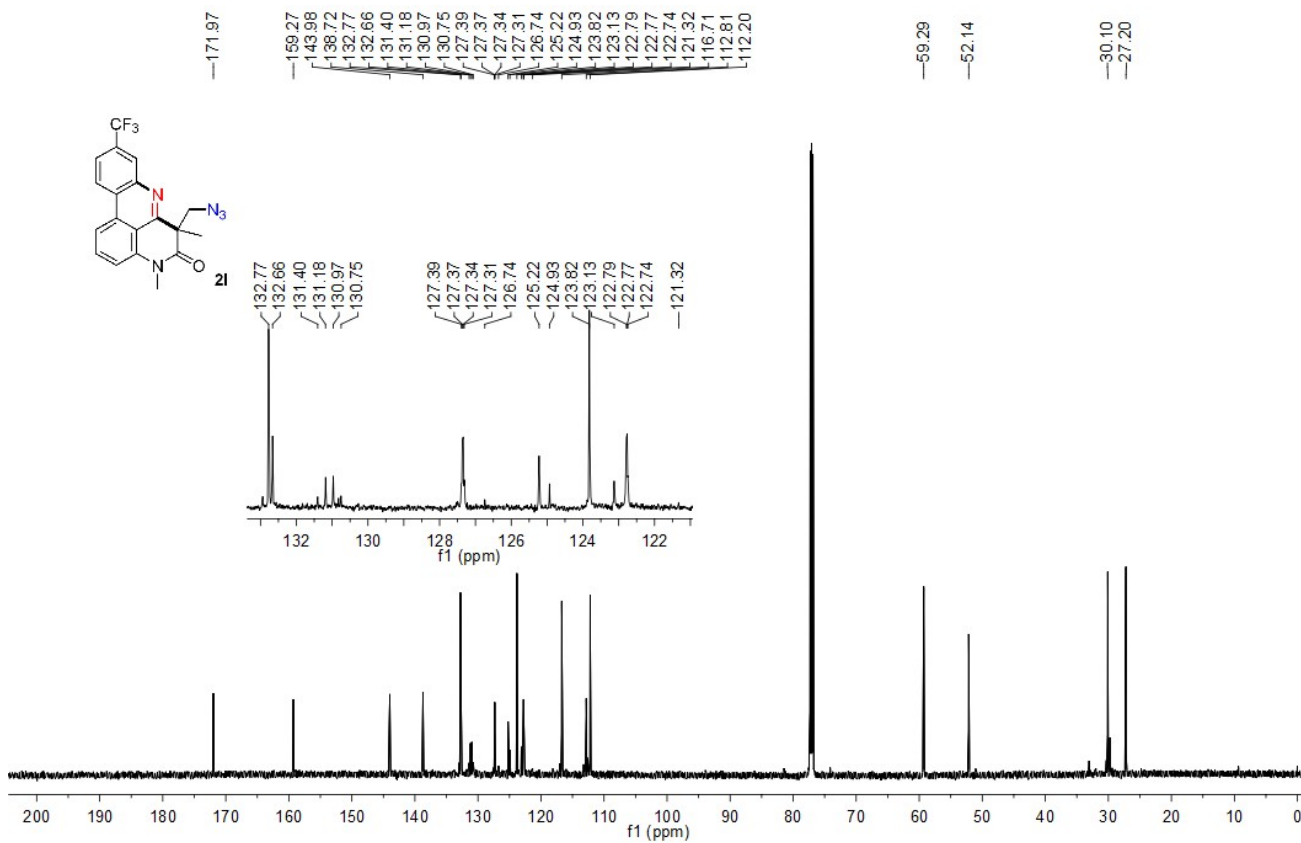

$^1\text{H}$  NMR, 600 MHz,  $\text{CDCl}_3$

8.635  
8.621  
8.498  
8.496  
8.316  
8.302  
7.952  
7.859  
7.885  
7.967

4.491  
4.472  
4.284  
4.265

3.640

1.656

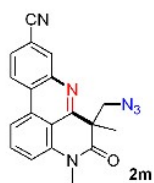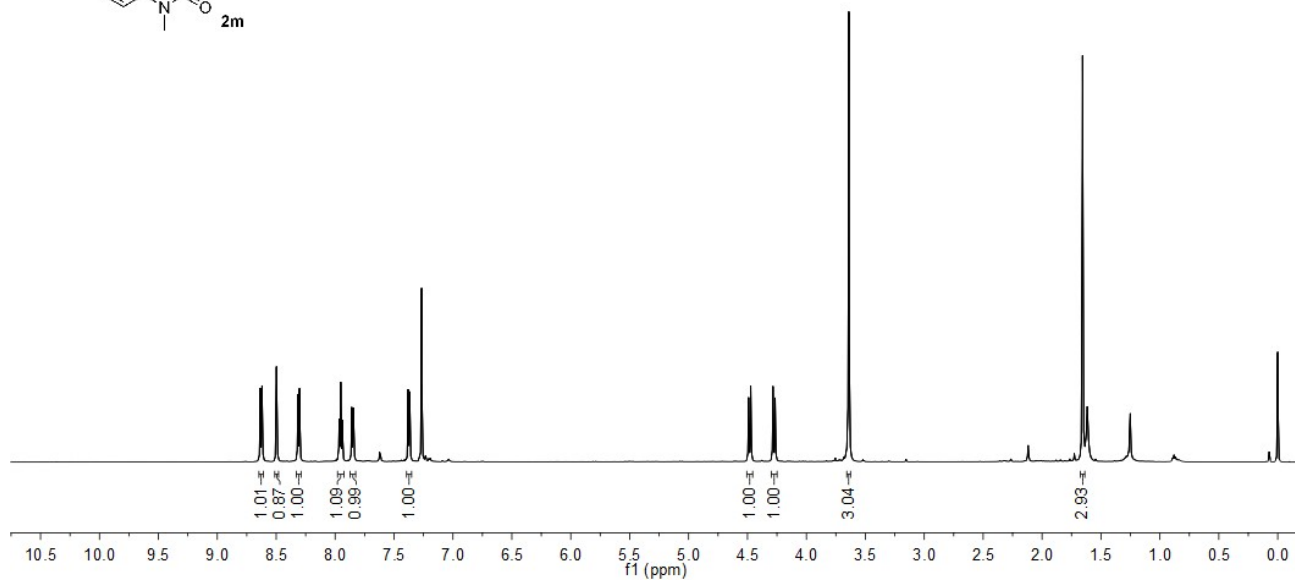

$^{13}\text{C}$  NMR (151 MHz,  $\text{CDCl}_3$ )

171.77  
159.96

143.86  
138.83  
134.87  
133.02  
132.34  
128.28  
126.12  
124.06  
118.50  
116.73  
112.90  
112.70  
112.59

59.20

52.19

30.09  
27.14

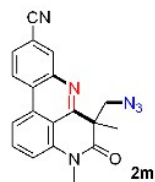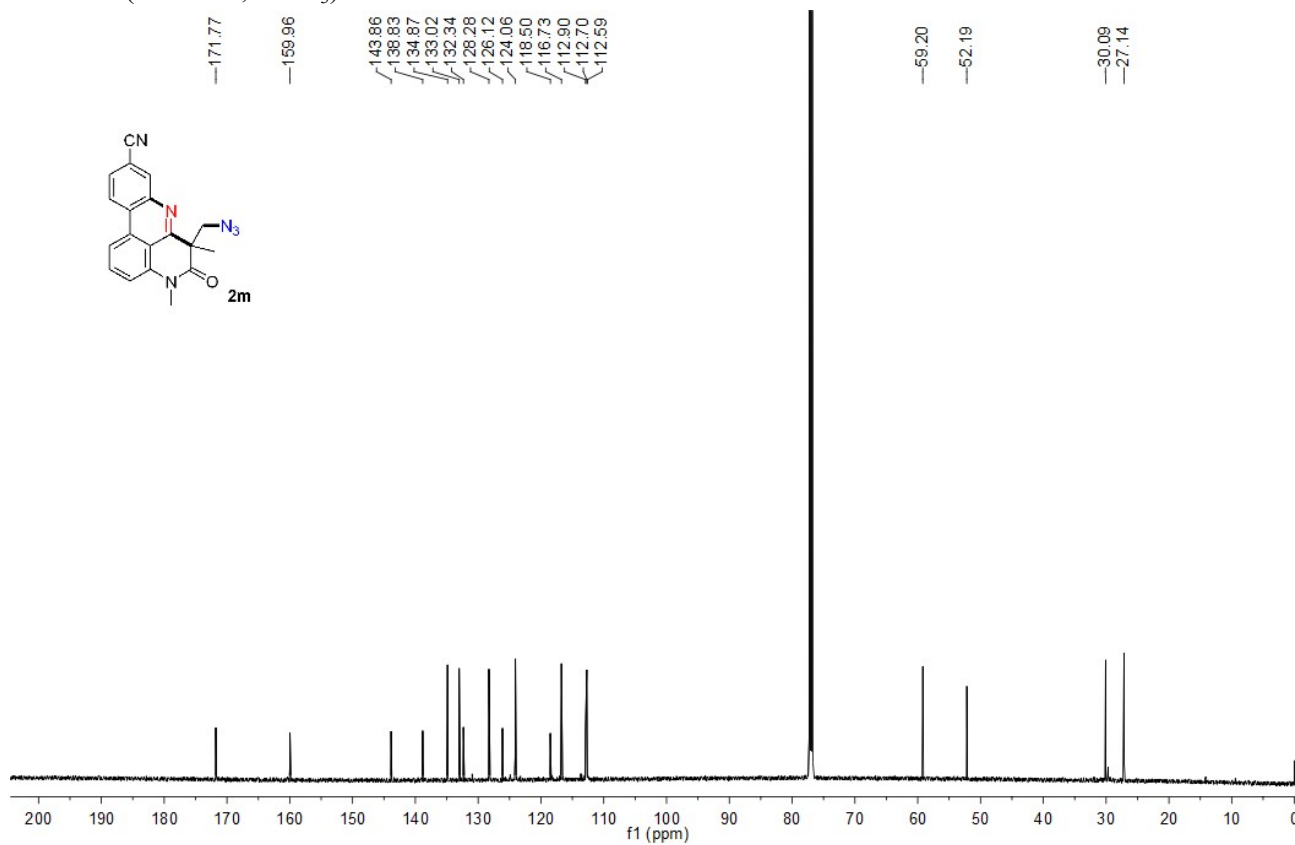

$^1\text{H}$  NMR, 600 MHz,  $\text{CDCl}_3$

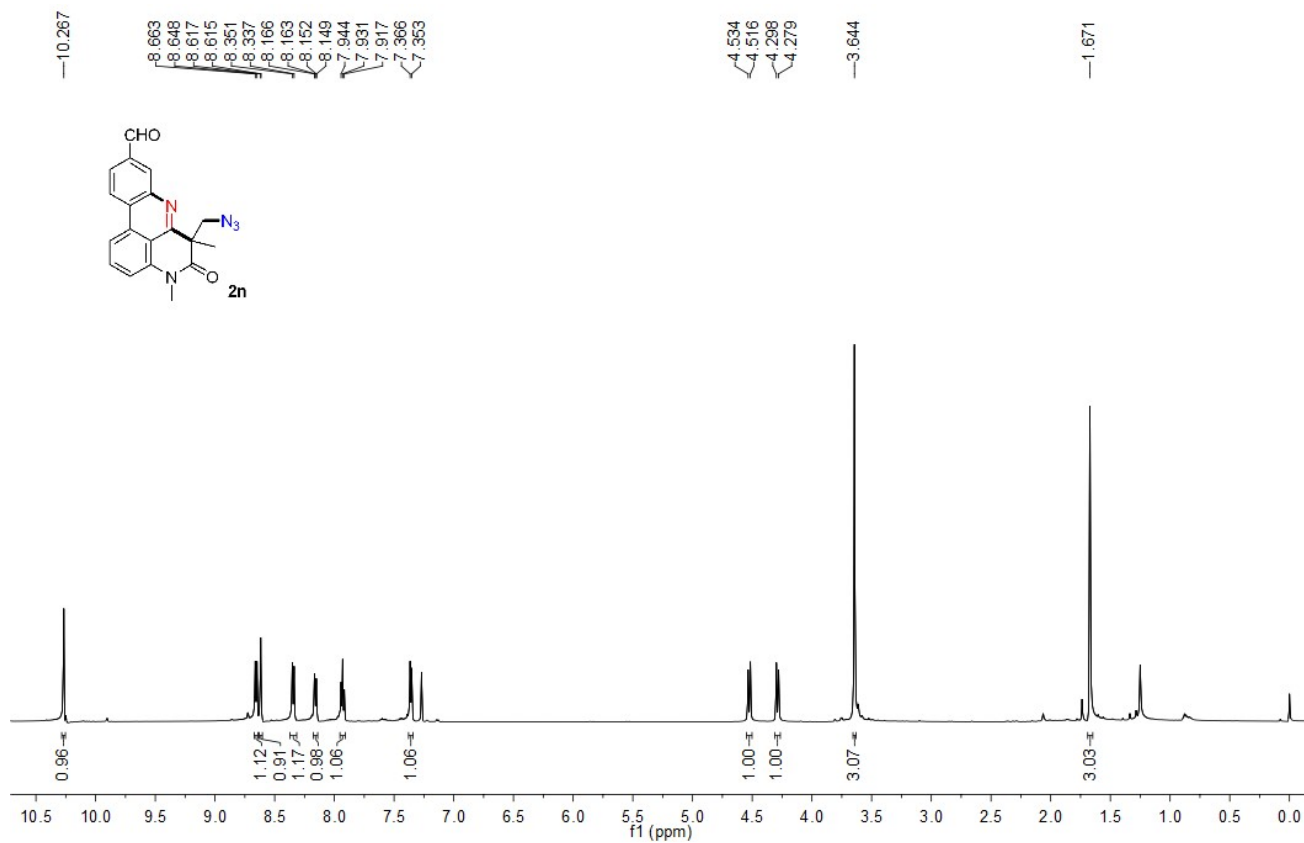

$^{13}\text{C}$  NMR (151 MHz,  $\text{CDCl}_3$ )

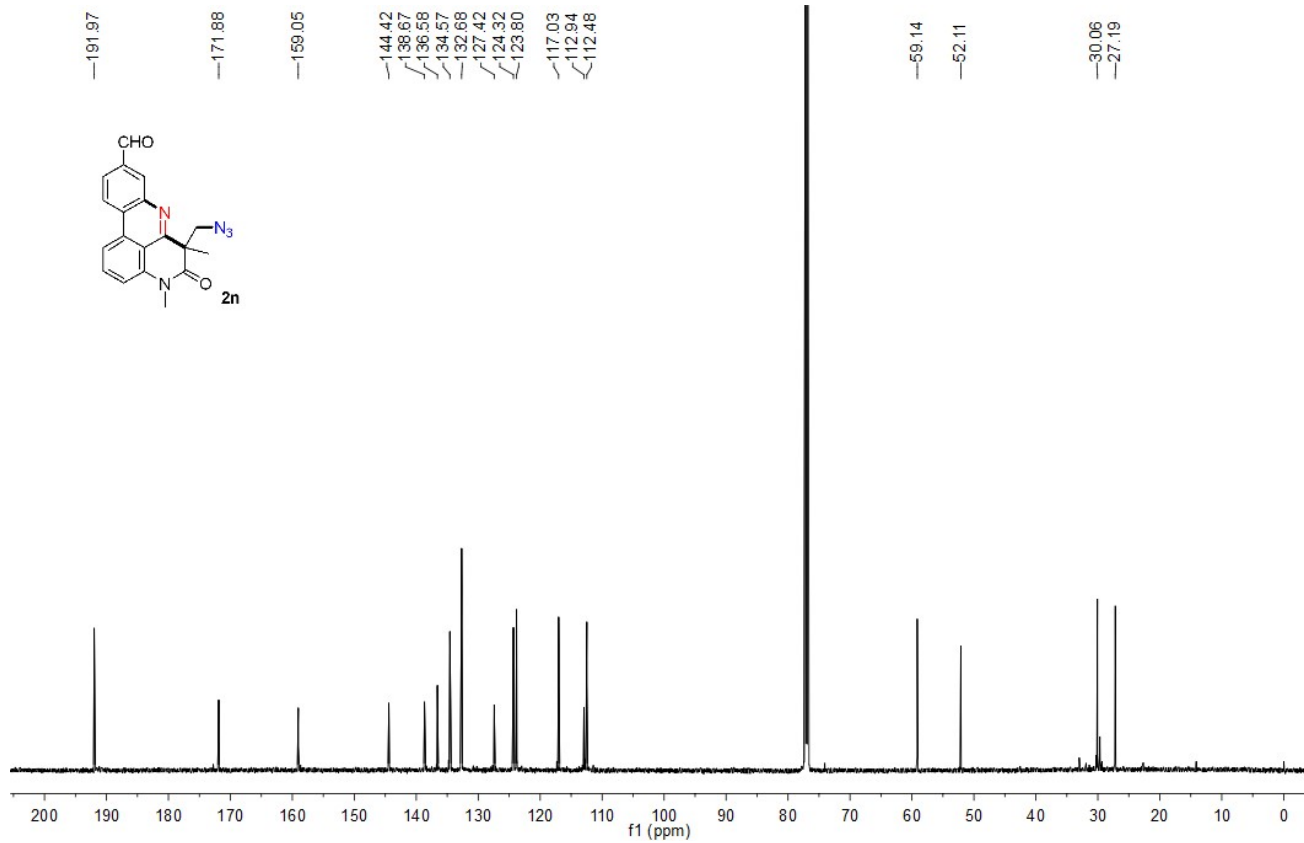

<sup>1</sup>H NMR, 600 MHz, CDCl<sub>3</sub>

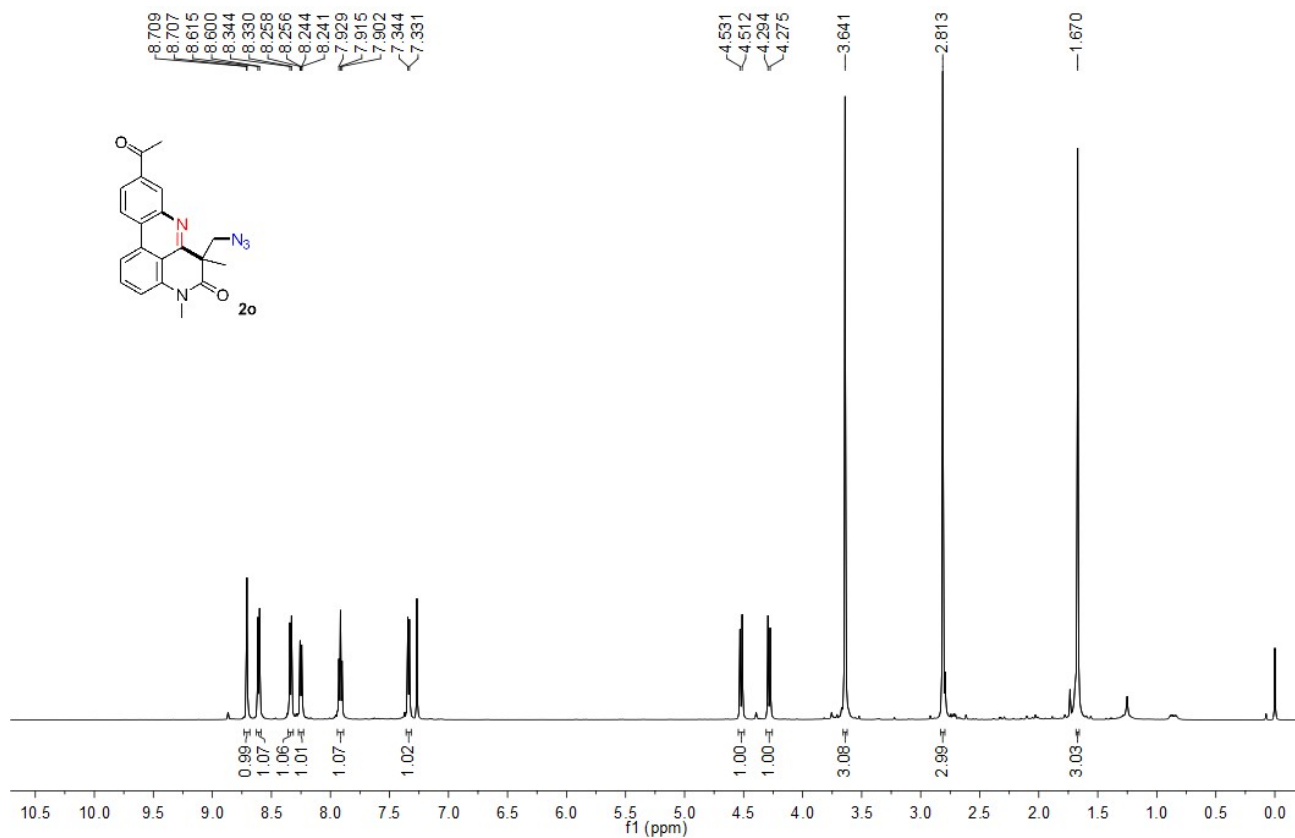

<sup>13</sup>C NMR (151 MHz, CDCl<sub>3</sub>)

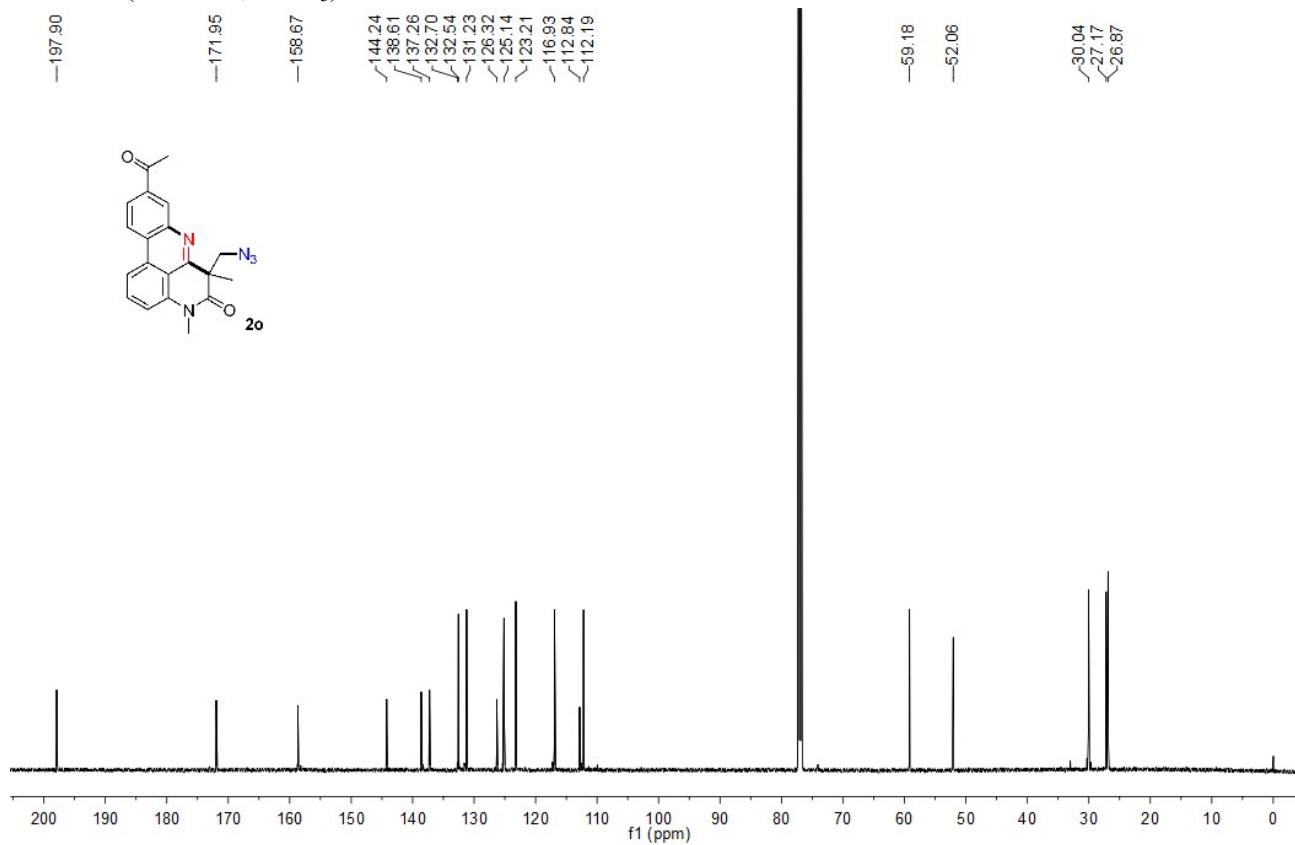

$^1\text{H}$  NMR, 600 MHz,  $\text{CDCl}_3$

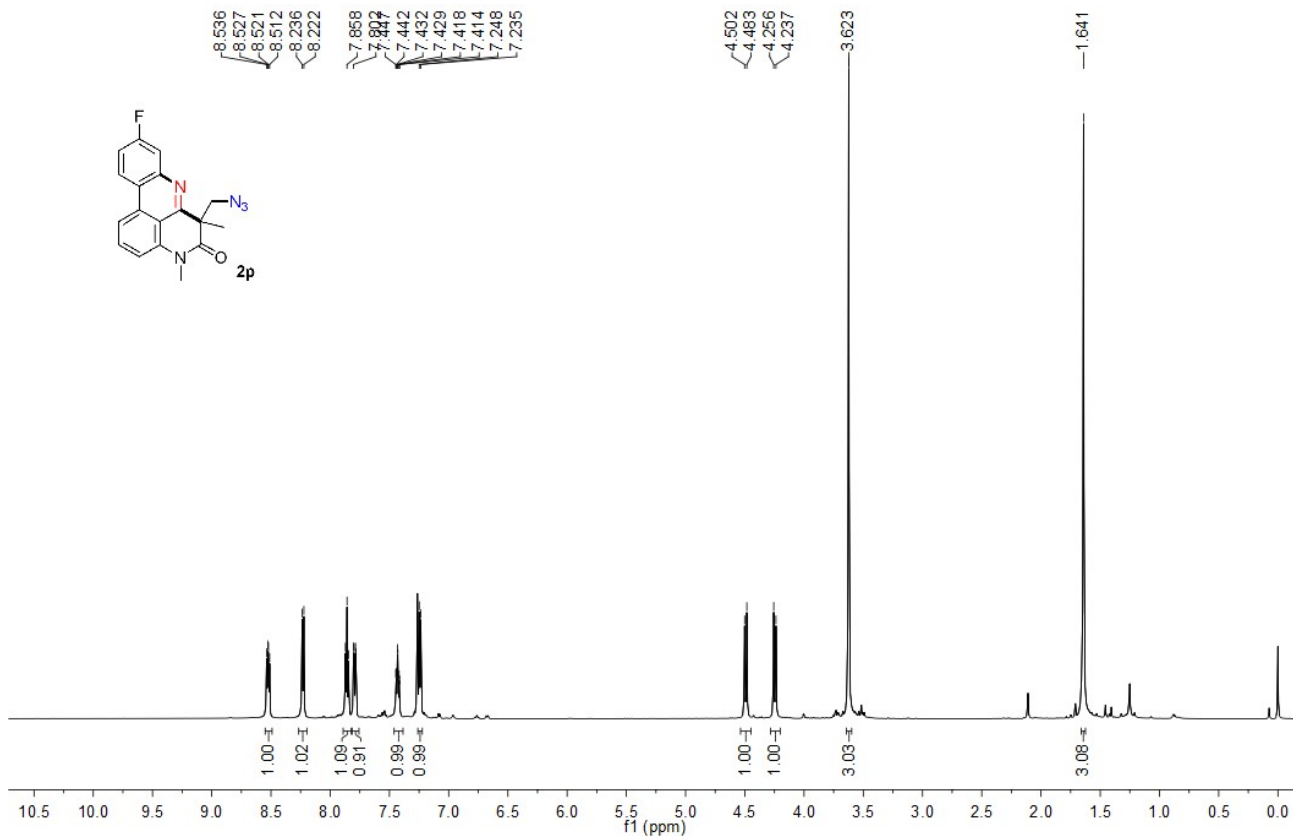

$^{13}\text{C}$  NMR (151 MHz,  $\text{CDCl}_3$ )

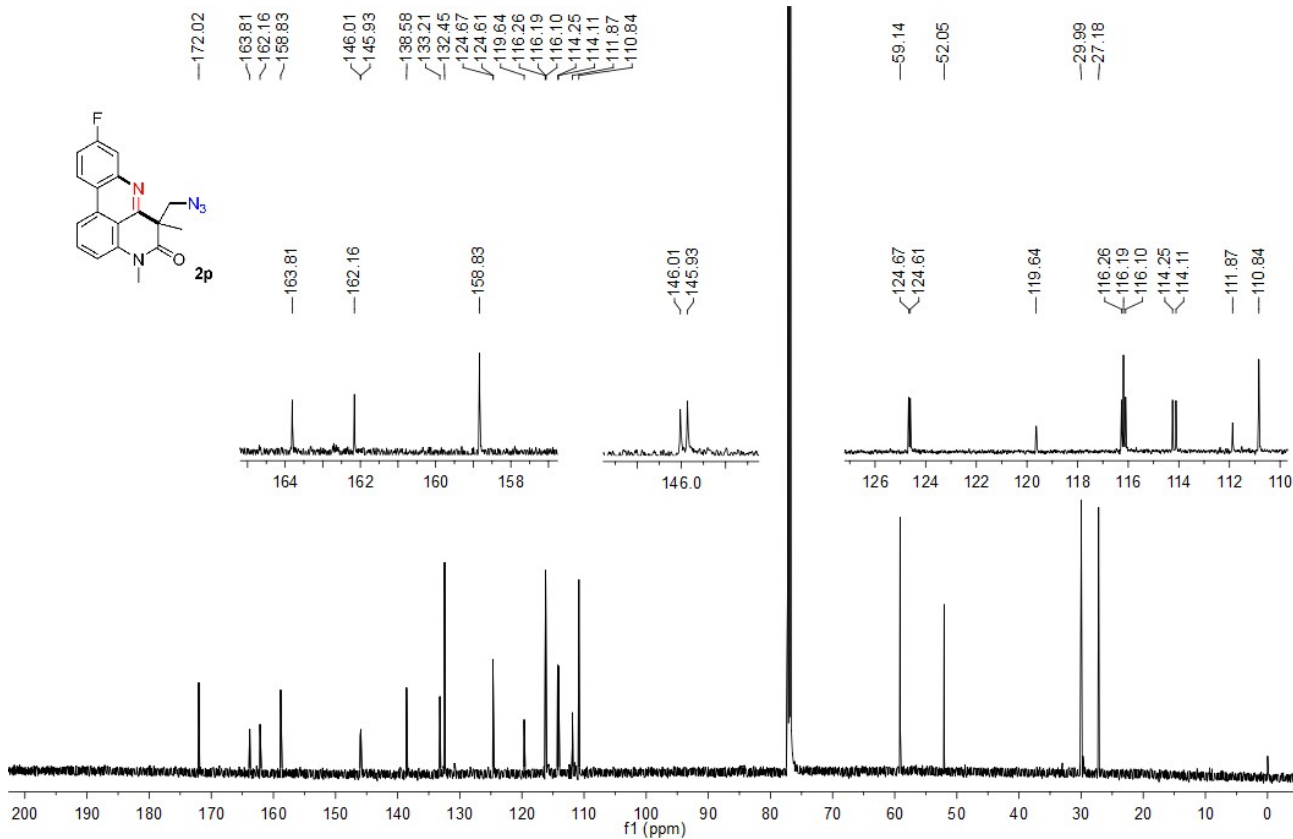



$^1\text{H}$  NMR, 600 MHz,  $\text{CDCl}_3$

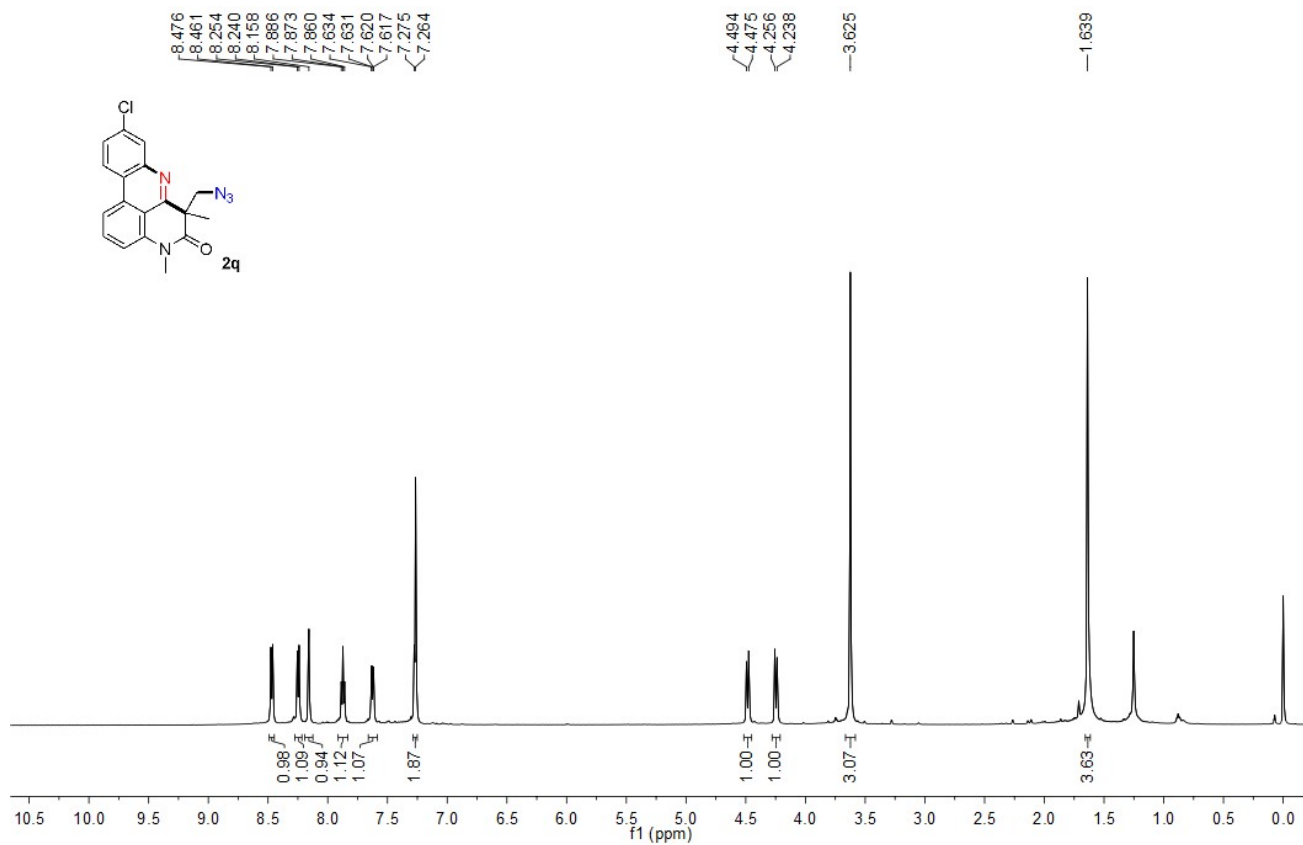

$^{13}\text{C}$  NMR (151 MHz,  $\text{CDCl}_3$ )

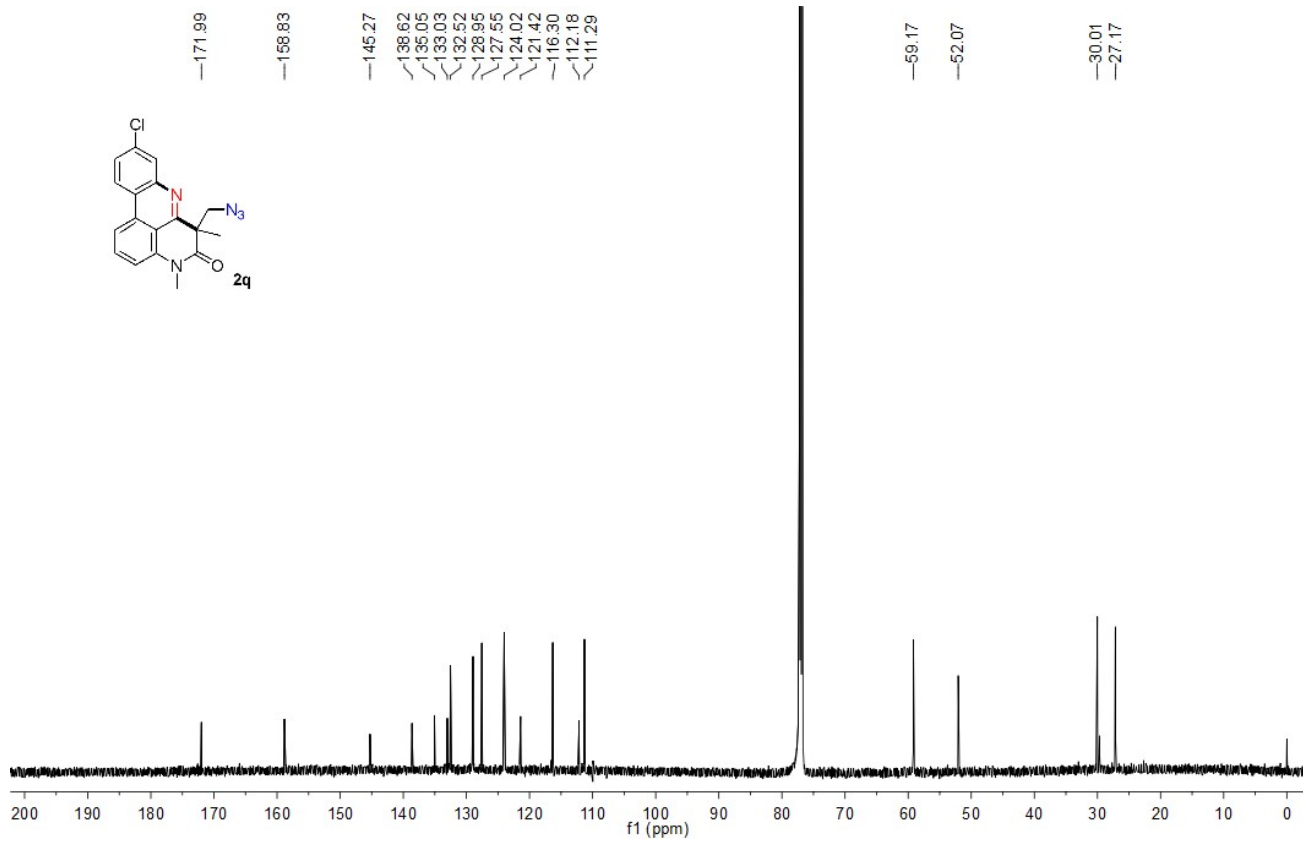

<sup>1</sup>H NMR, 600 MHz, CDCl<sub>3</sub>

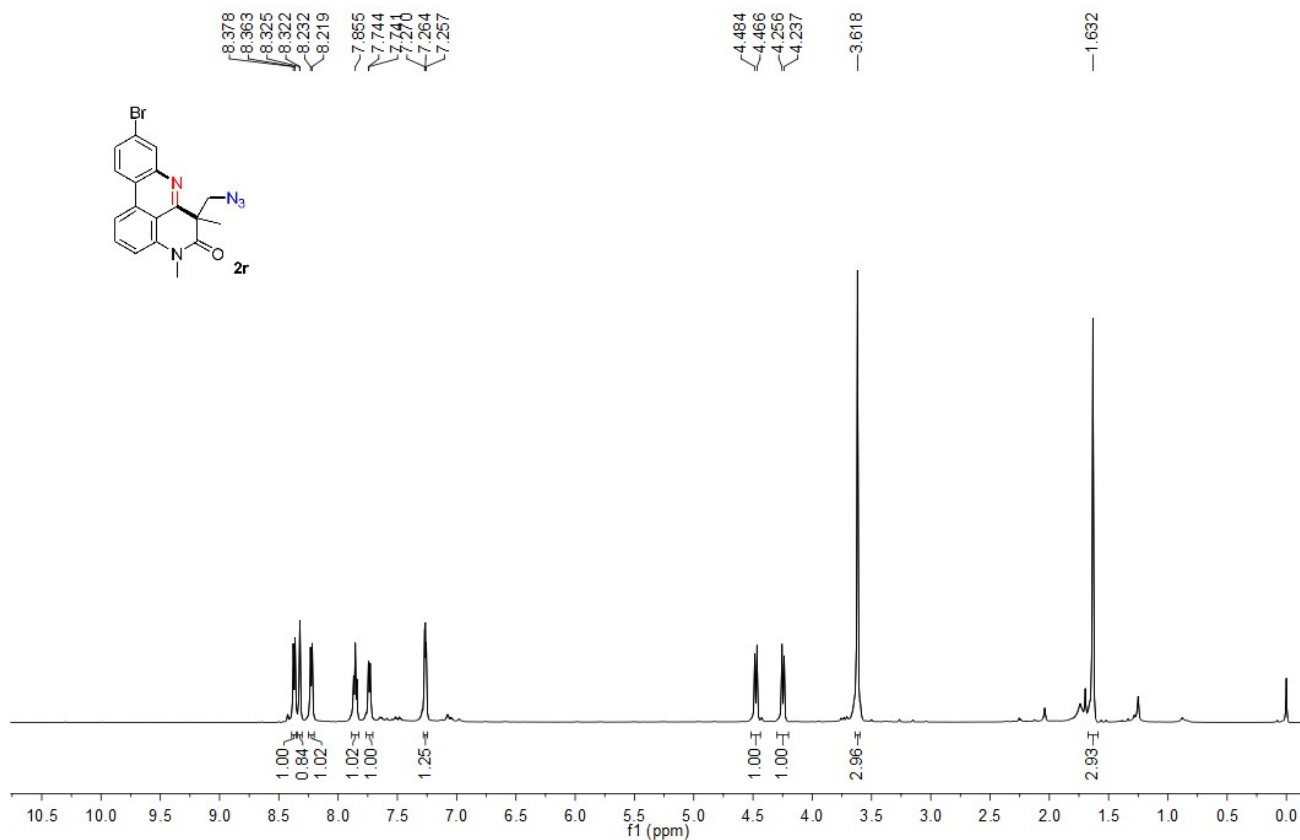

<sup>13</sup>C NMR (151 MHz, CDCl<sub>3</sub>)

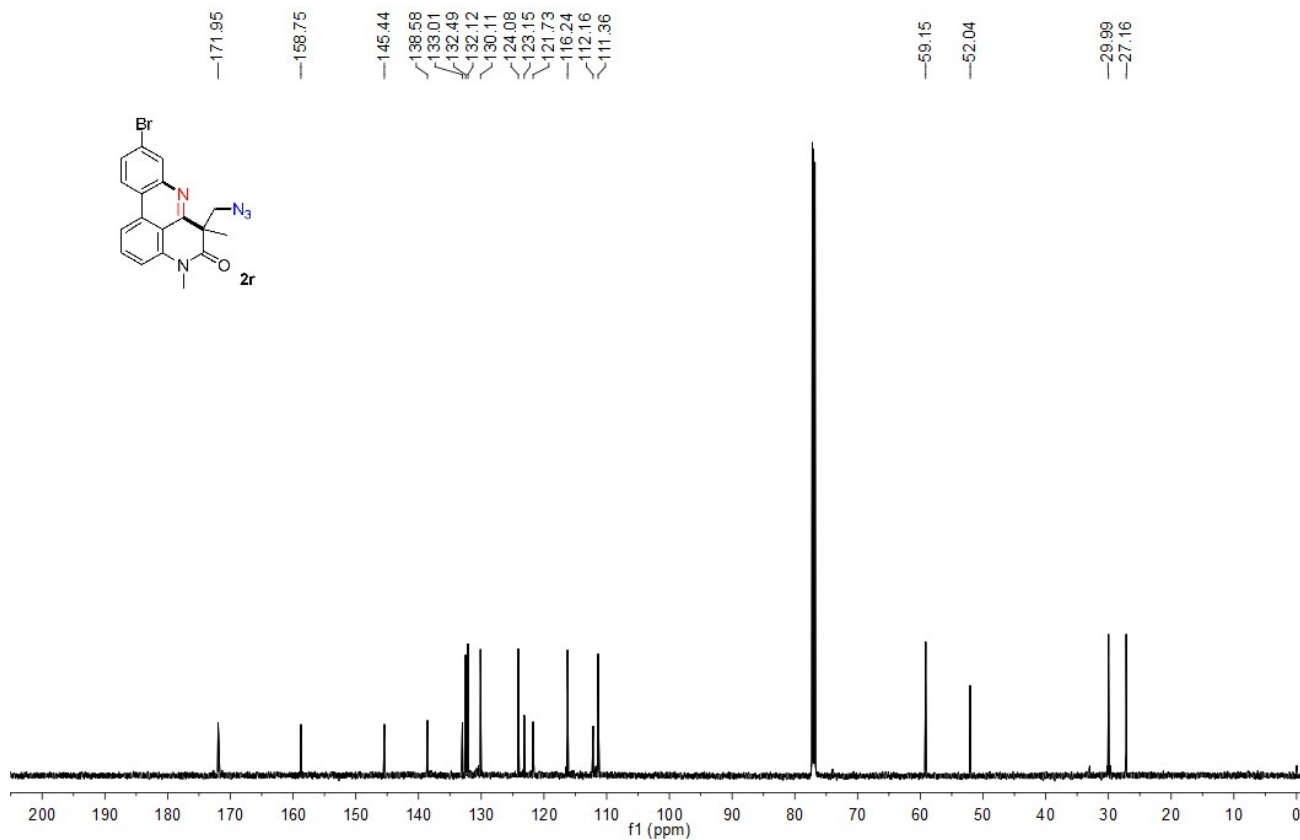

<sup>1</sup>H NMR, 600 MHz, CDCl<sub>3</sub>

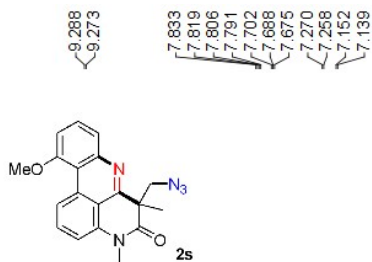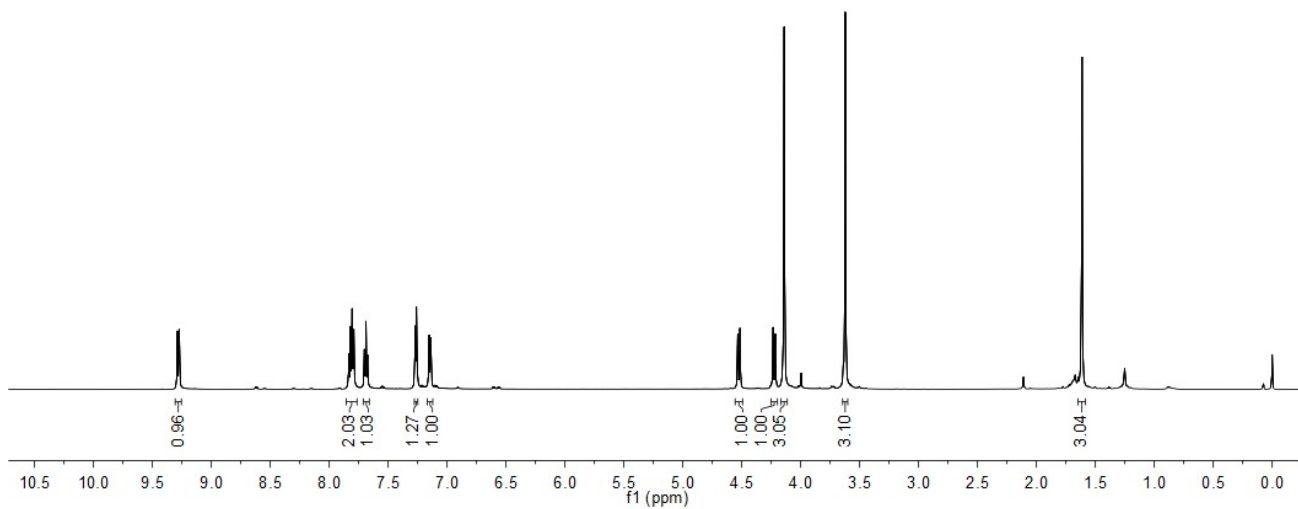

<sup>13</sup>C NMR (151 MHz, CDCl<sub>3</sub>)

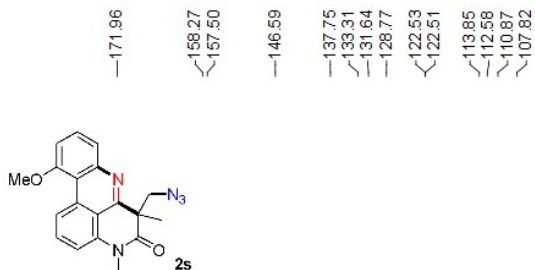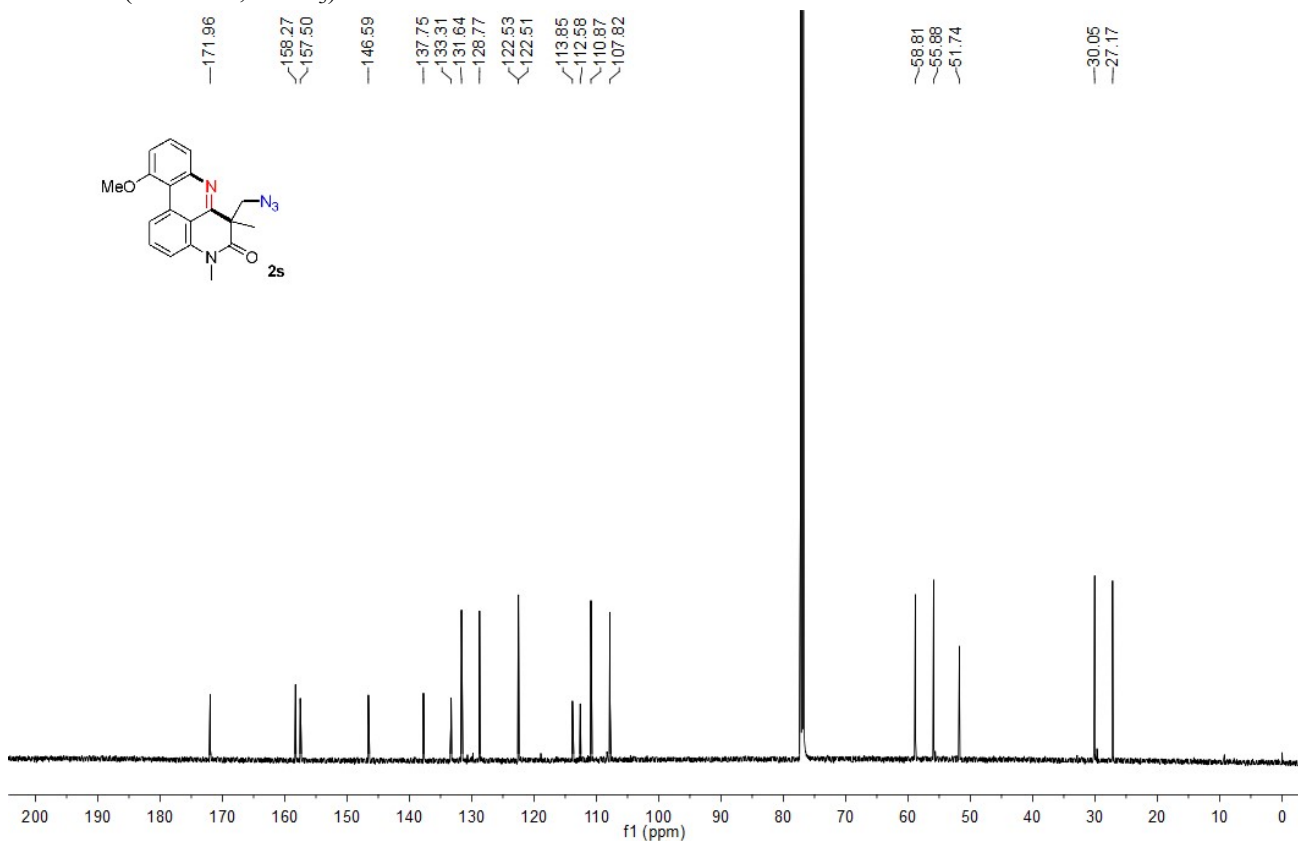

<sup>1</sup>H NMR, 600 MHz, CDCl<sub>3</sub>

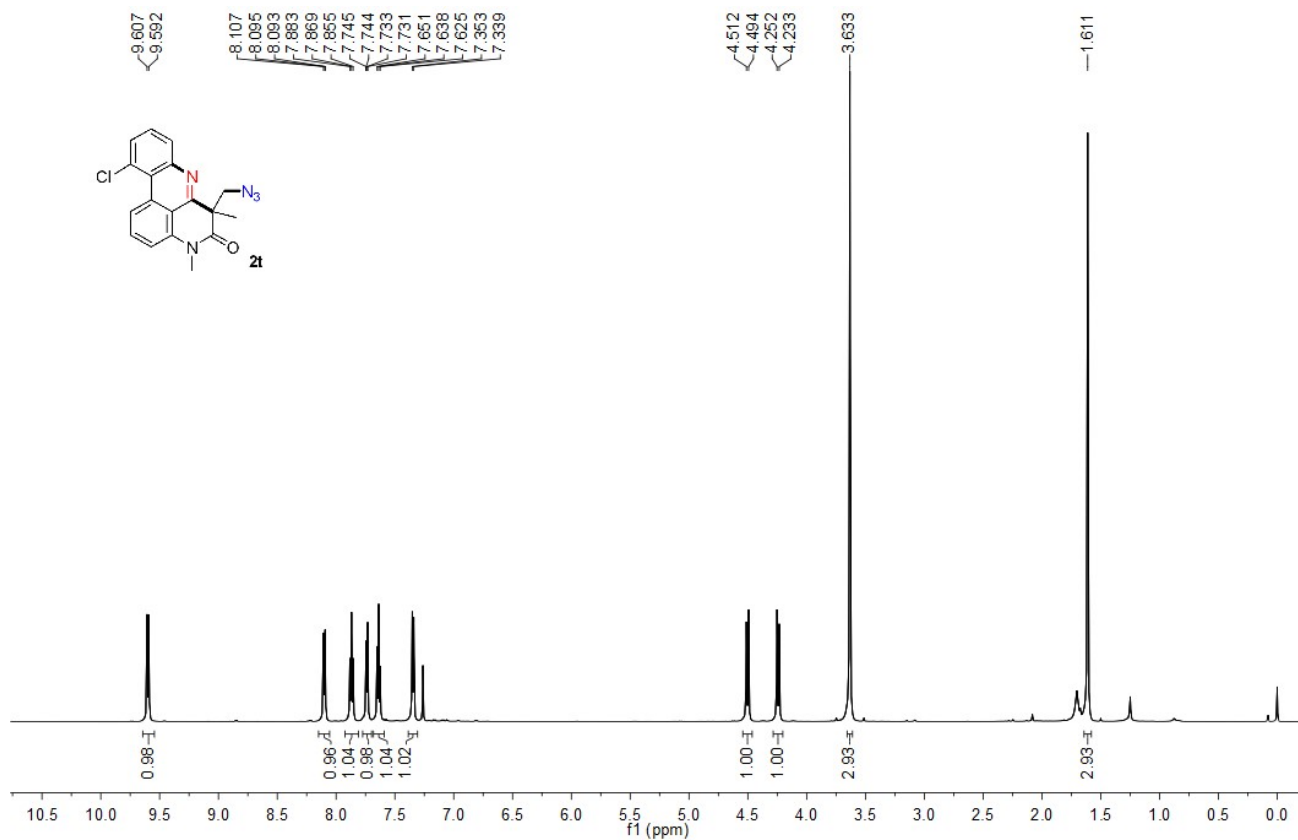

<sup>13</sup>C NMR (151 MHz, CDCl<sub>3</sub>)

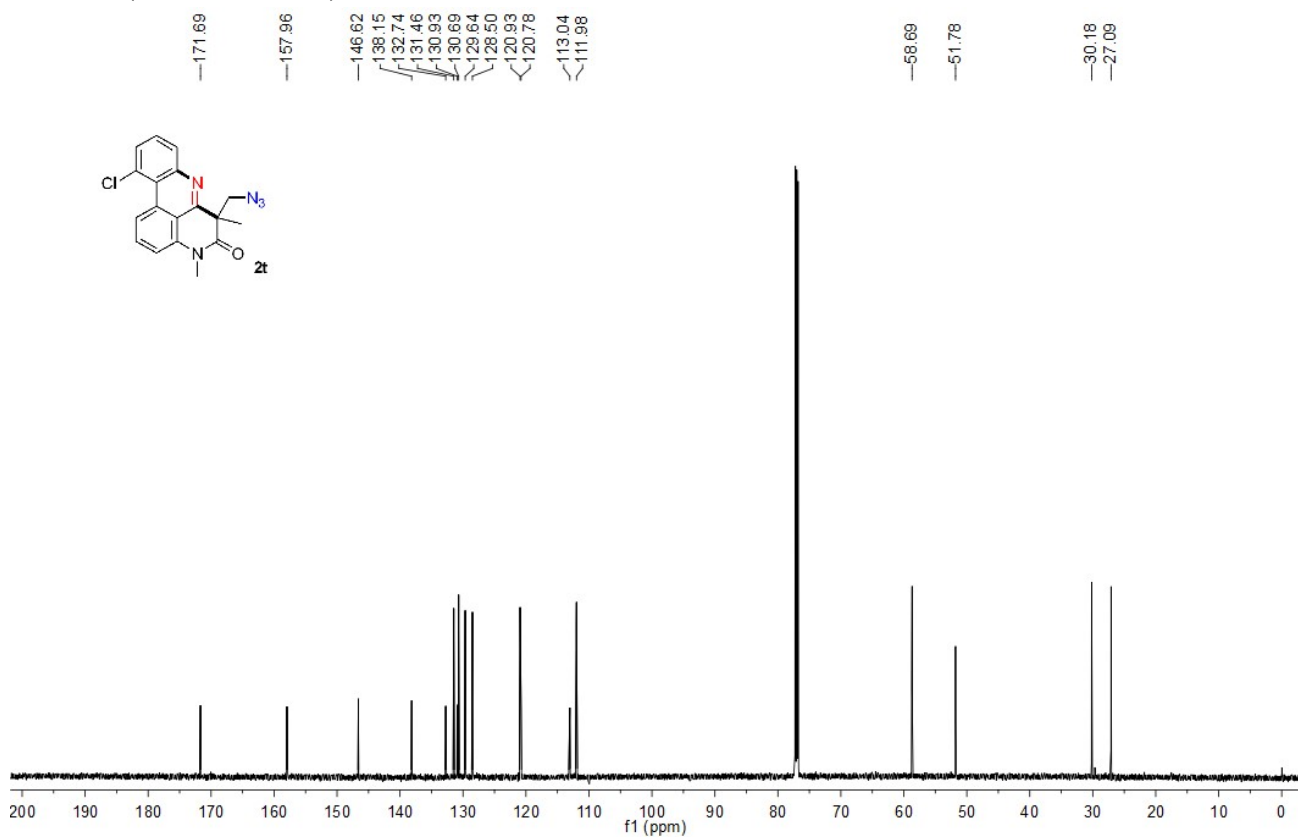

$^1\text{H}$  NMR, 600 MHz,  $\text{CDCl}_3$

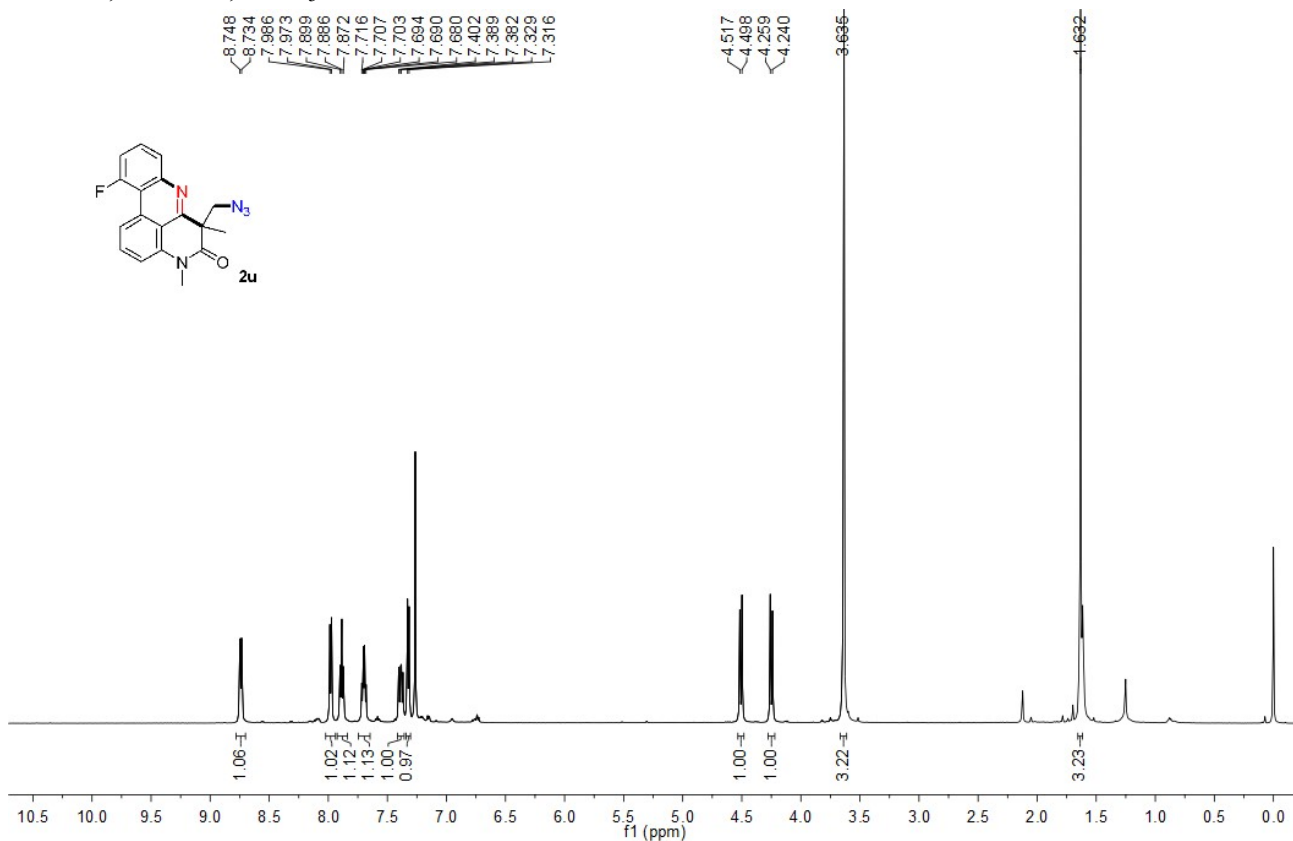

$^{13}\text{C}$  NMR (151 MHz,  $\text{CDCl}_3$ )

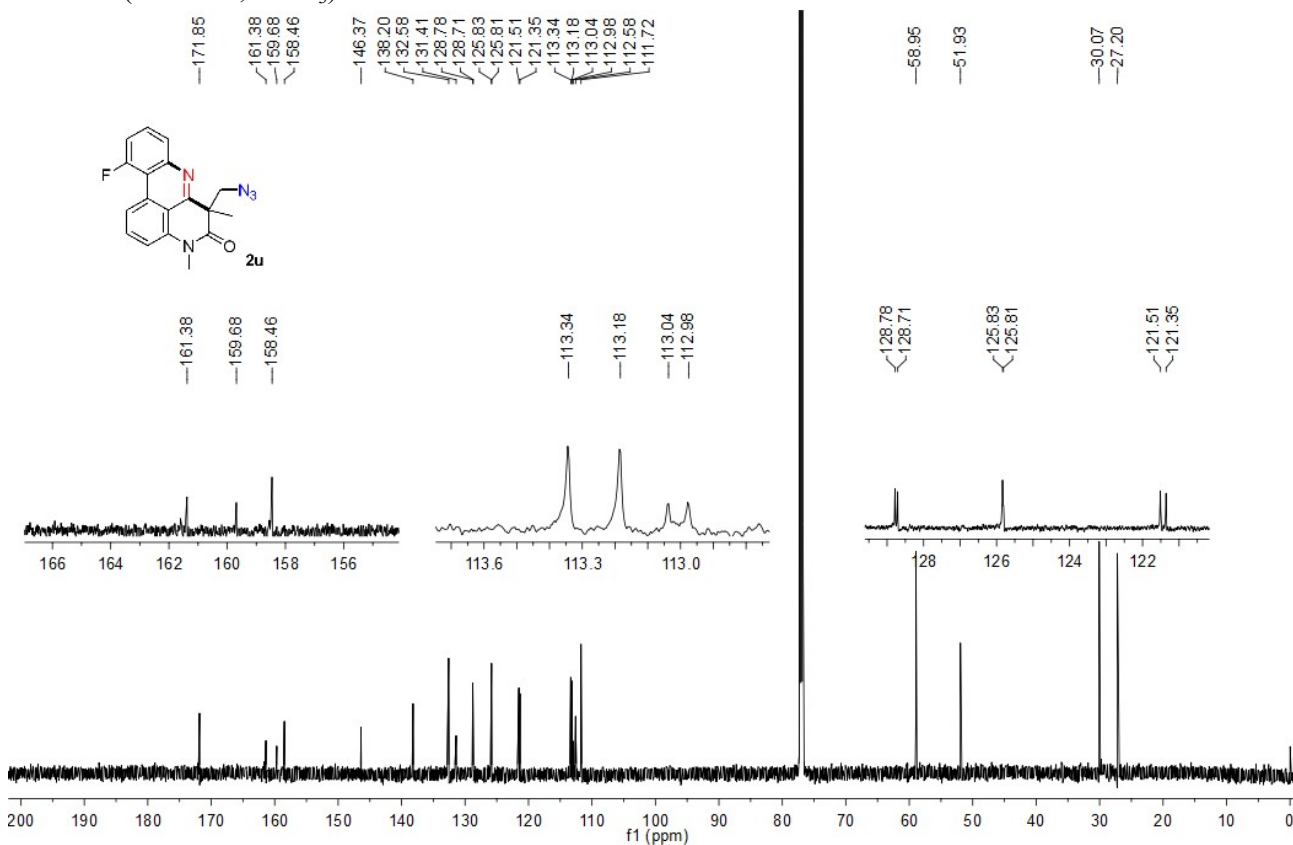

<sup>1</sup>H NMR, 600 MHz, CDCl<sub>3</sub>

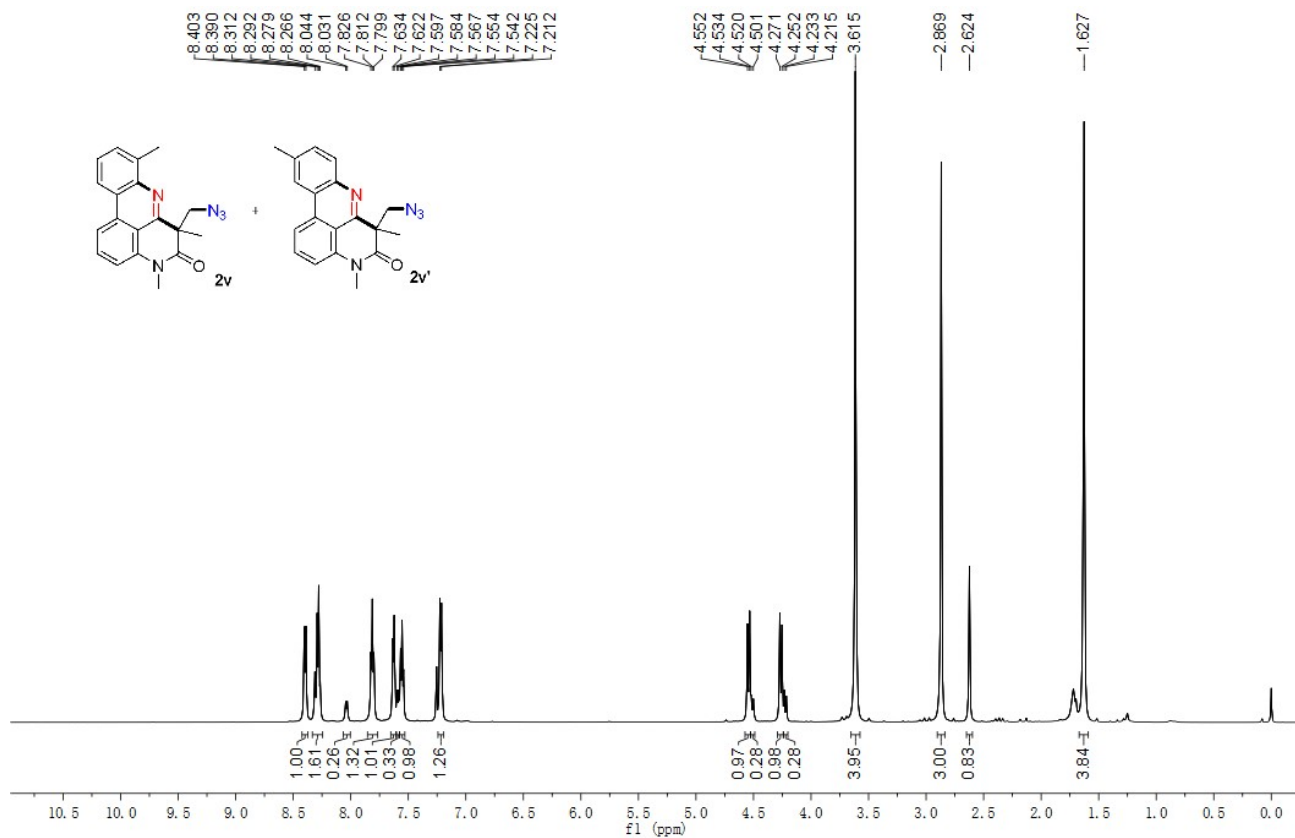

<sup>13</sup>C NMR (151 MHz, CDCl<sub>3</sub>)

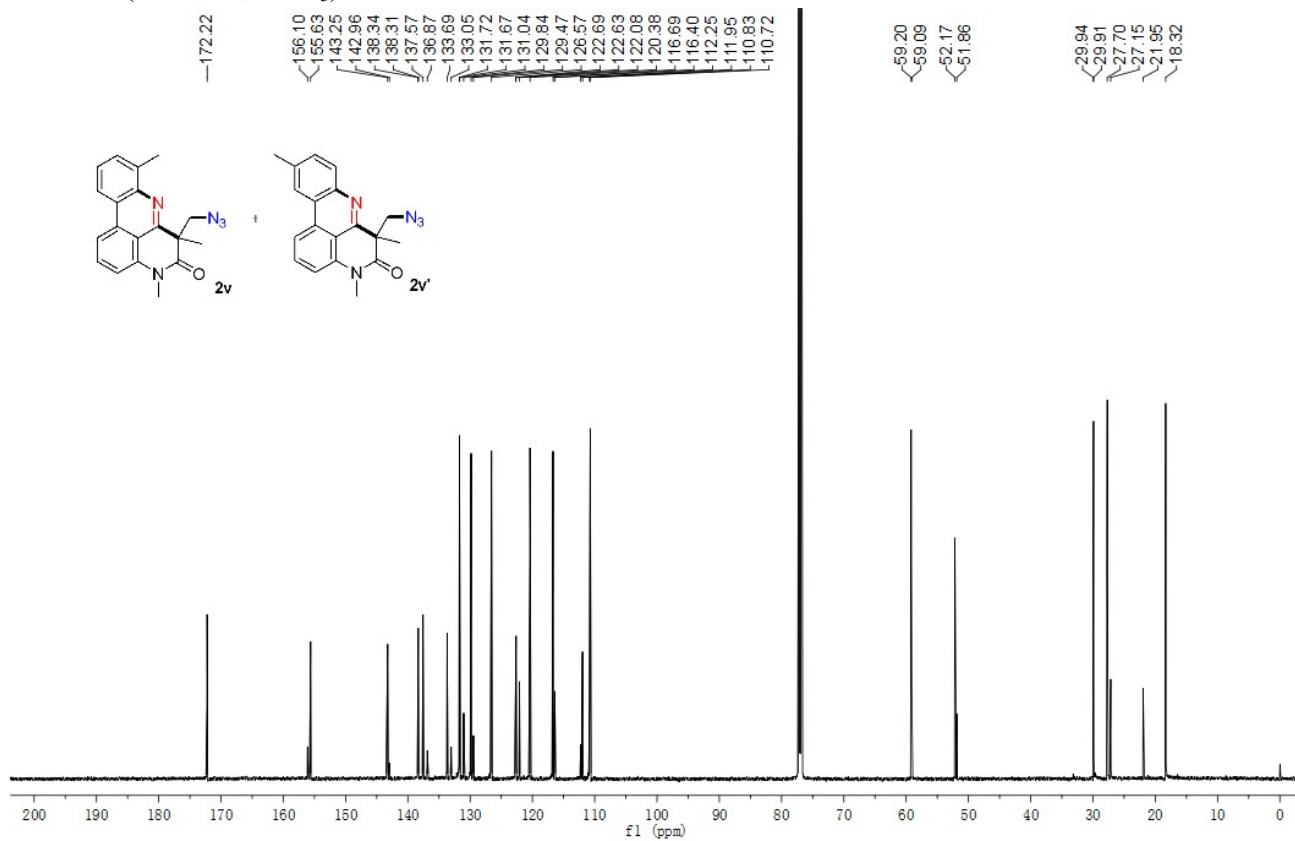

$^1\text{H}$  NMR, 600 MHz,  $\text{CDCl}_3$

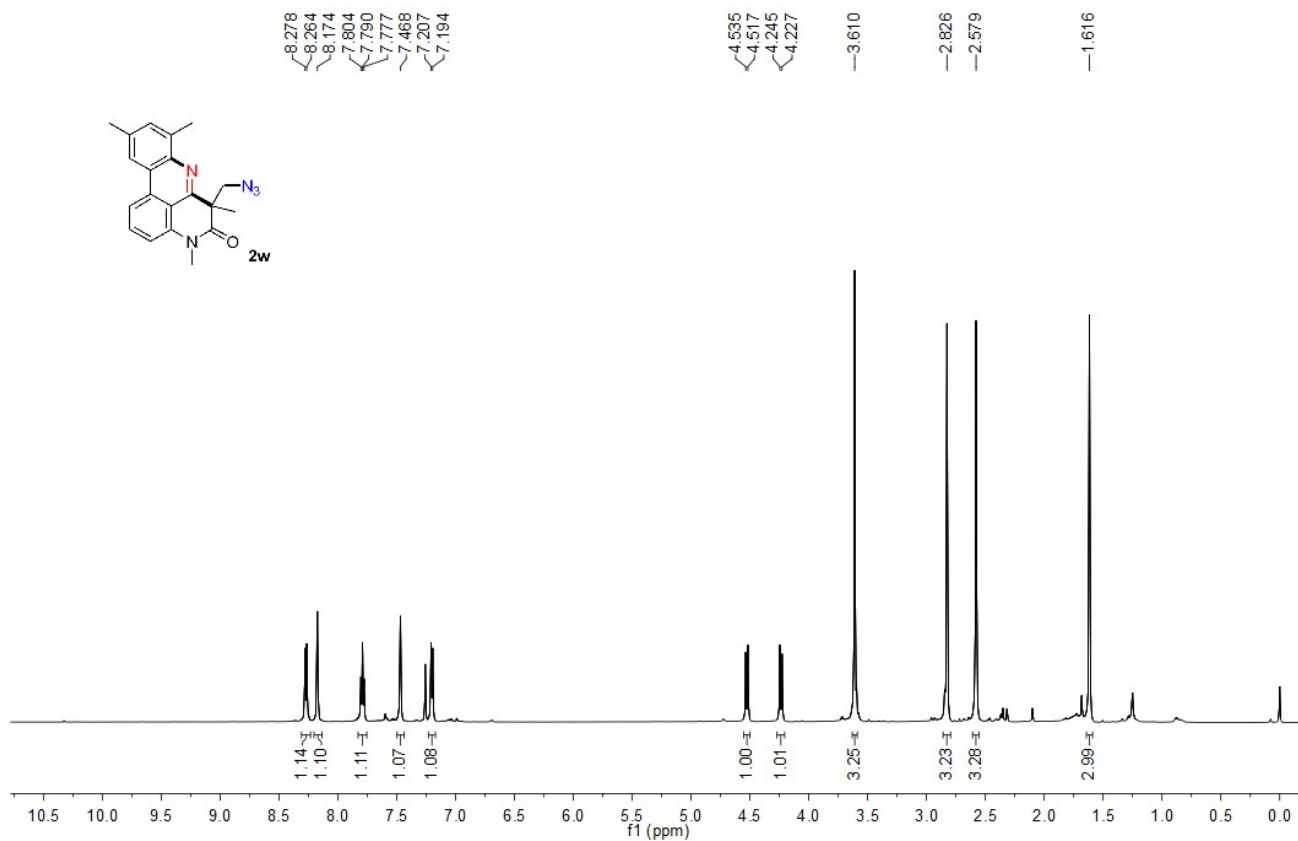

$^{13}\text{C}$  NMR (151 MHz,  $\text{CDCl}_3$ )

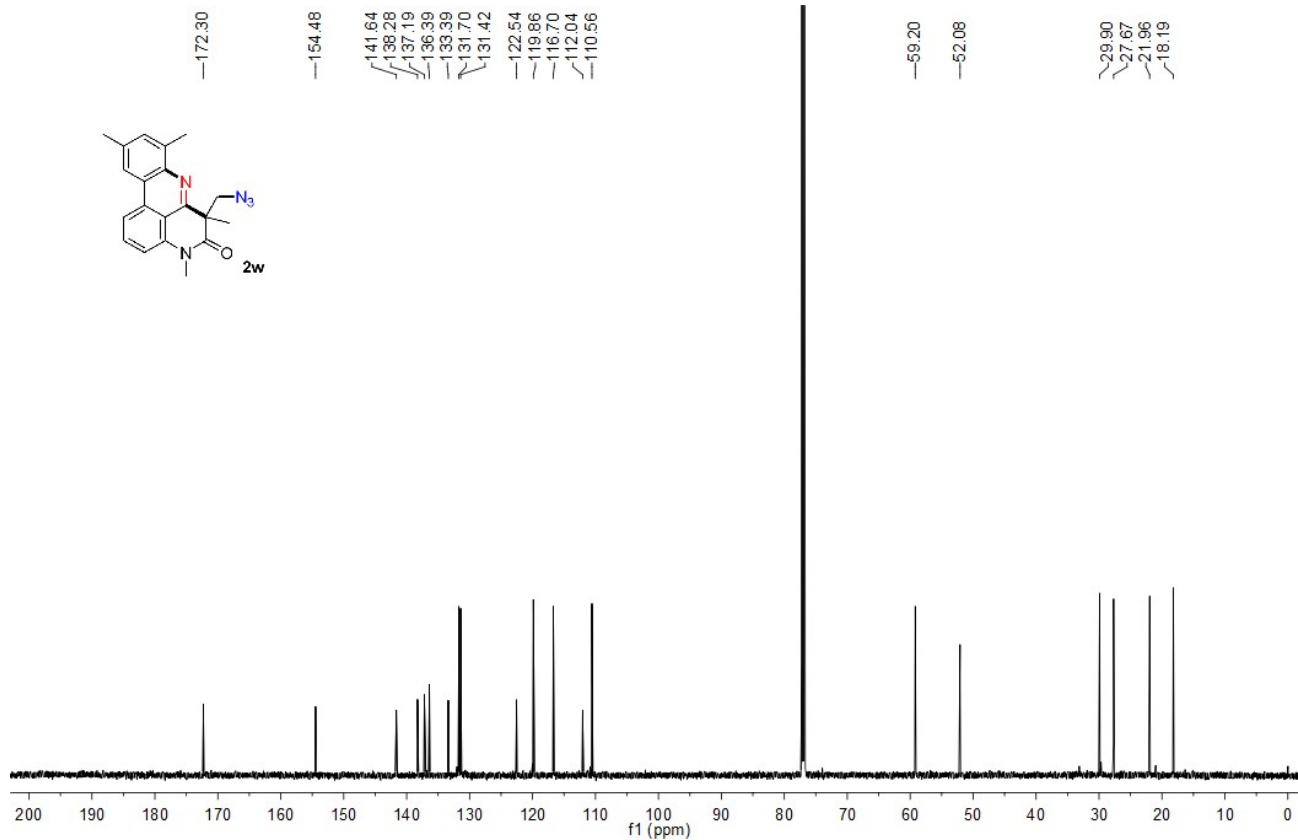

<sup>1</sup>H NMR, 600 MHz, CDCl<sub>3</sub>

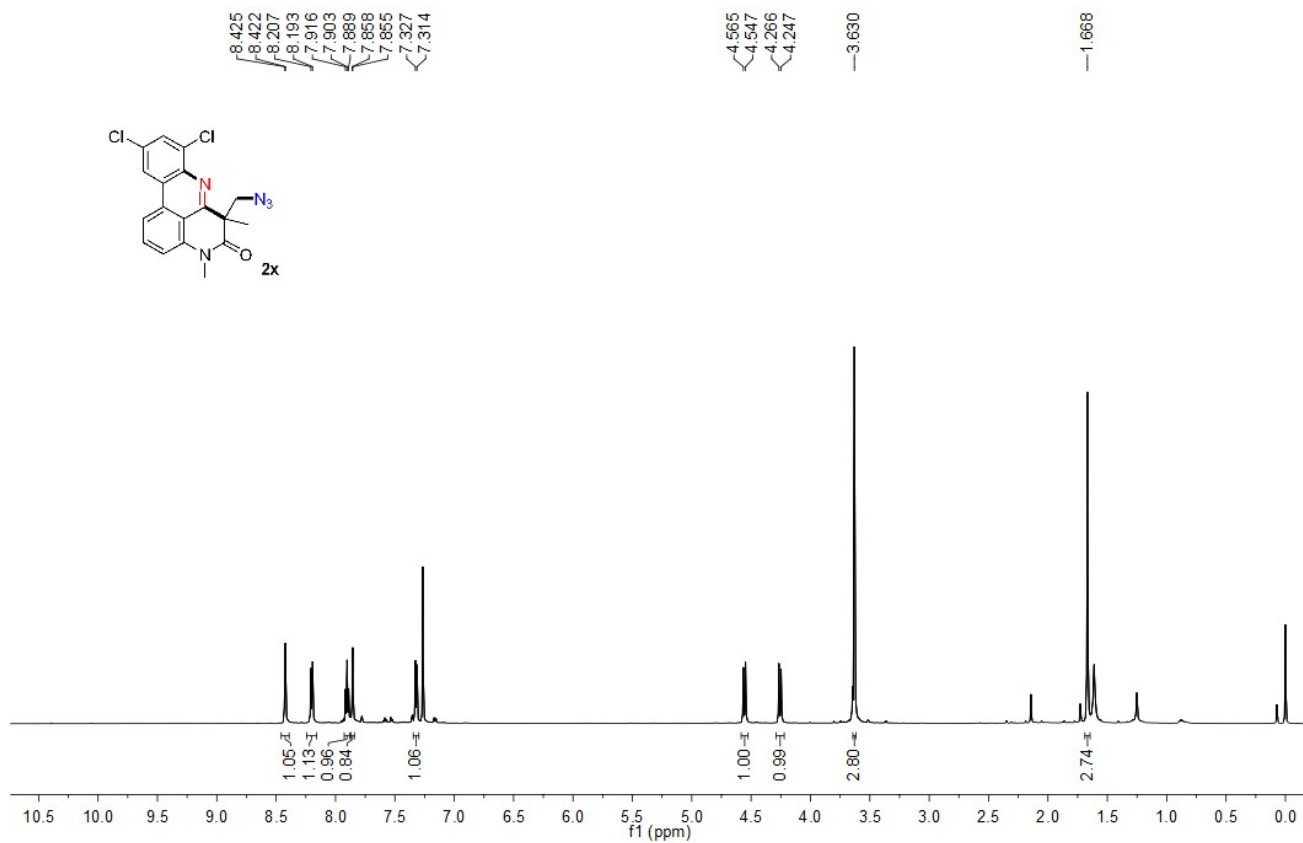

<sup>13</sup>C NMR (151 MHz, CDCl<sub>3</sub>)

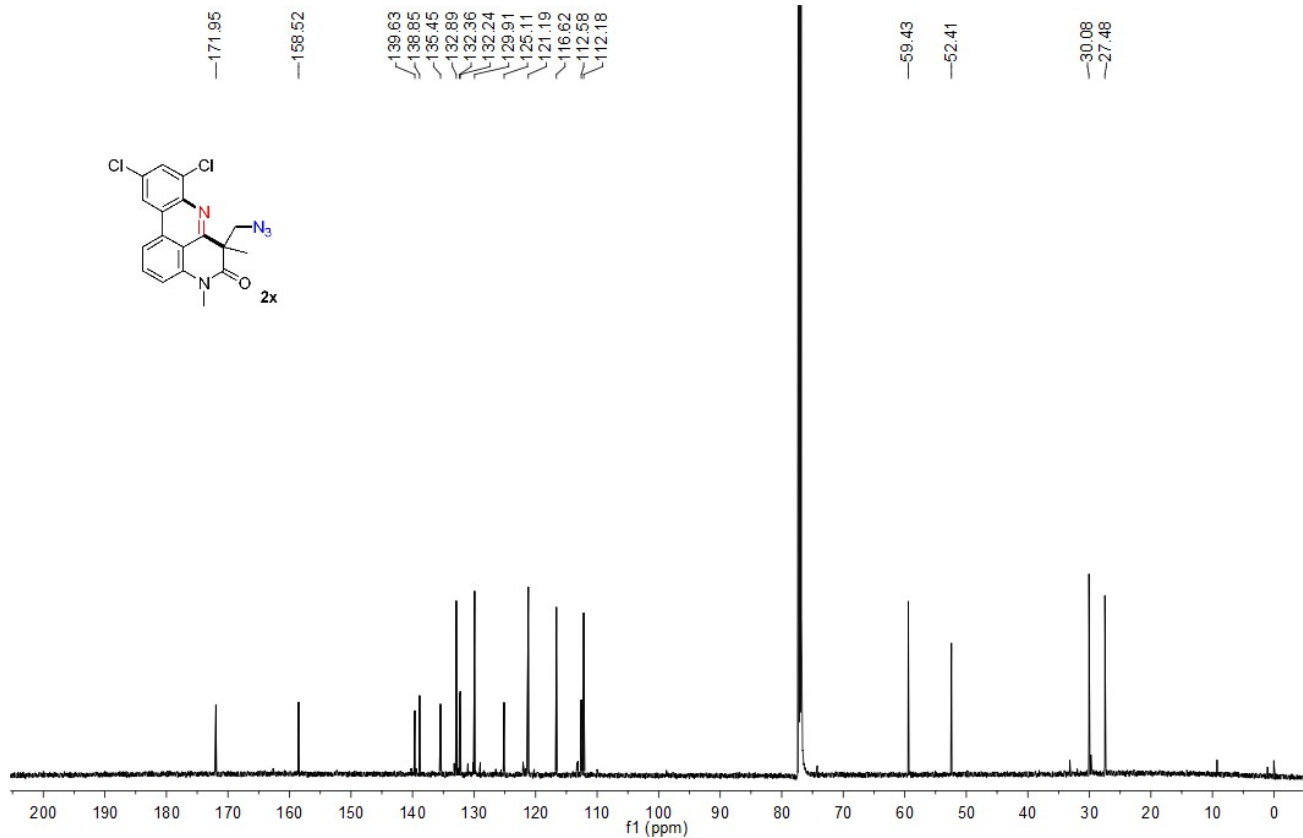



$^1\text{H}$  NMR, 600 MHz,  $\text{CDCl}_3$

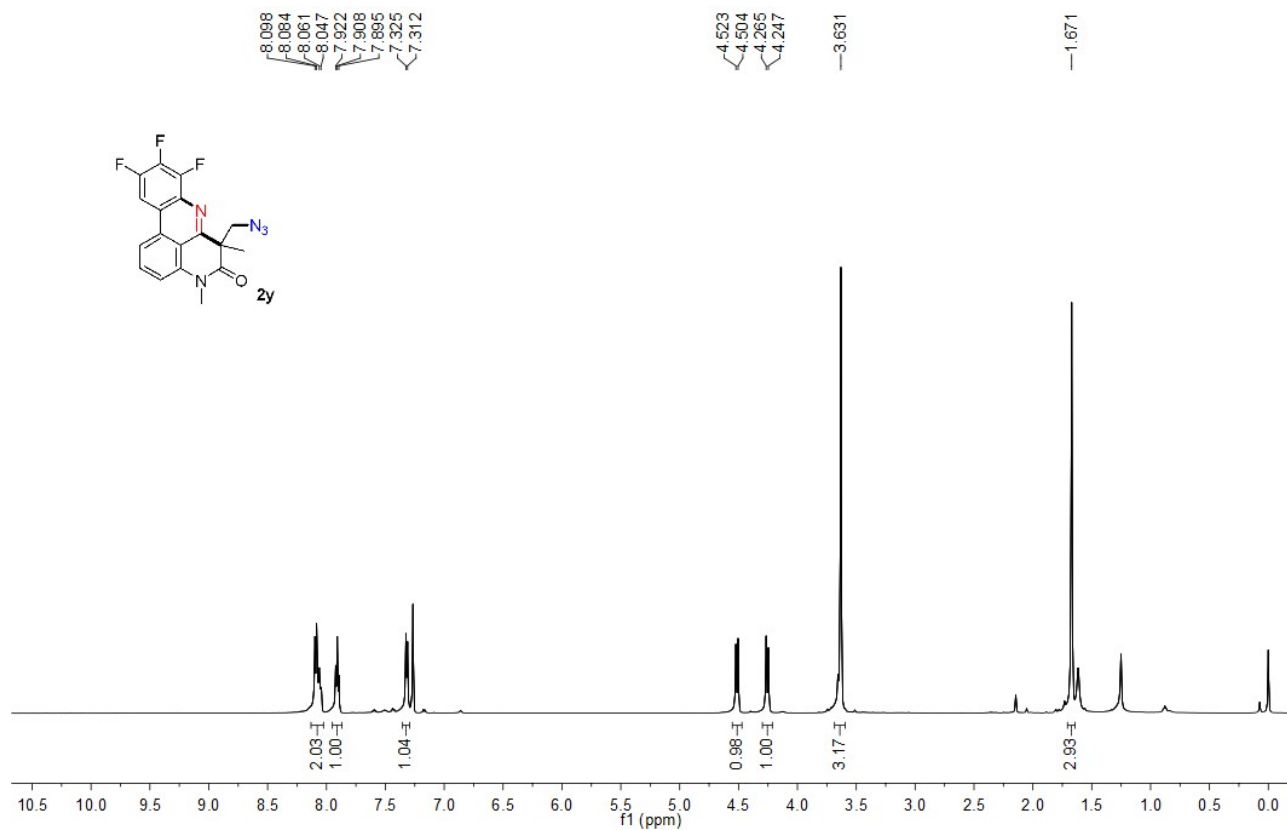

$^{13}\text{C}$  NMR (151 MHz,  $\text{CDCl}_3$ )

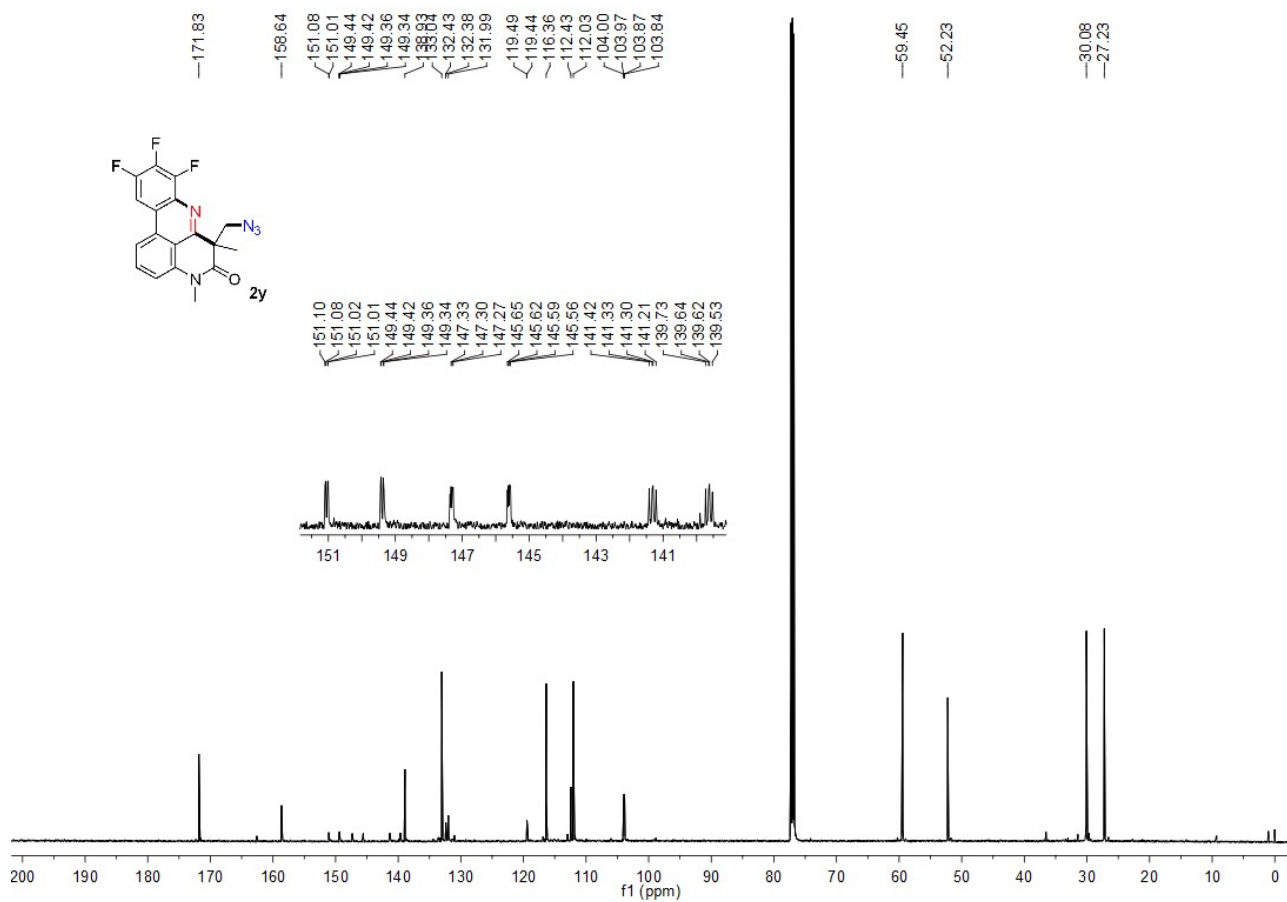

$^1\text{H}$  NMR, 600 MHz,  $\text{CDCl}_3$

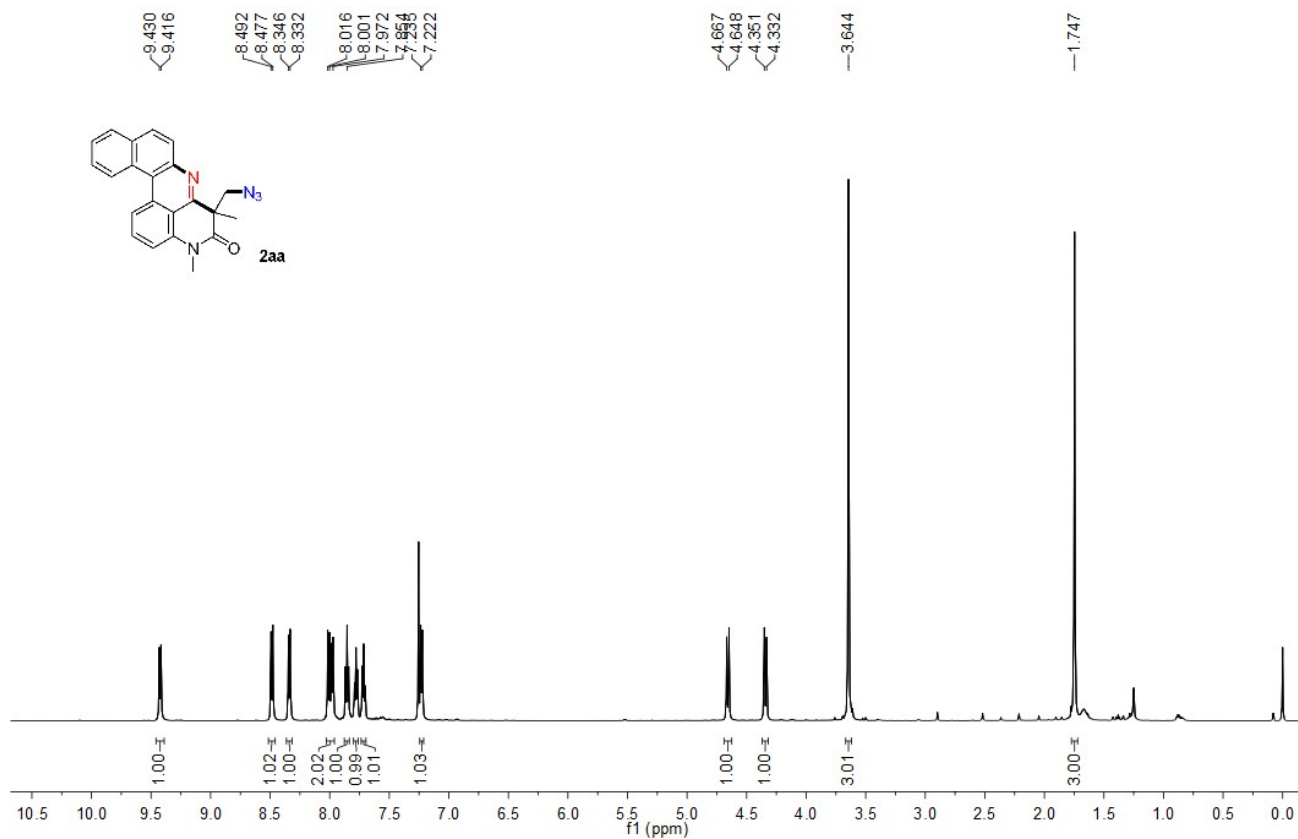

$^{13}\text{C}$  NMR (151 MHz,  $\text{CDCl}_3$ )

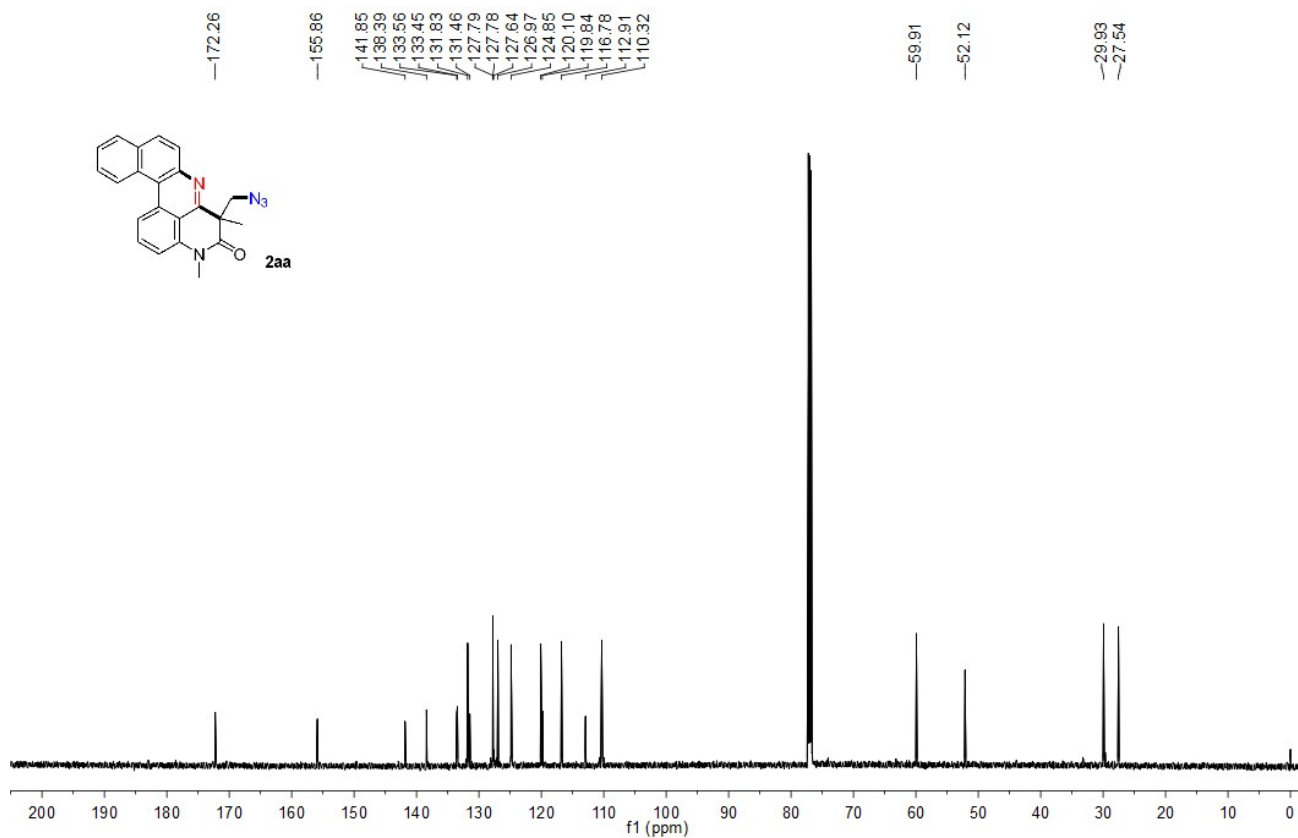

$^1\text{H}$  NMR, 600 MHz,  $\text{CDCl}_3$

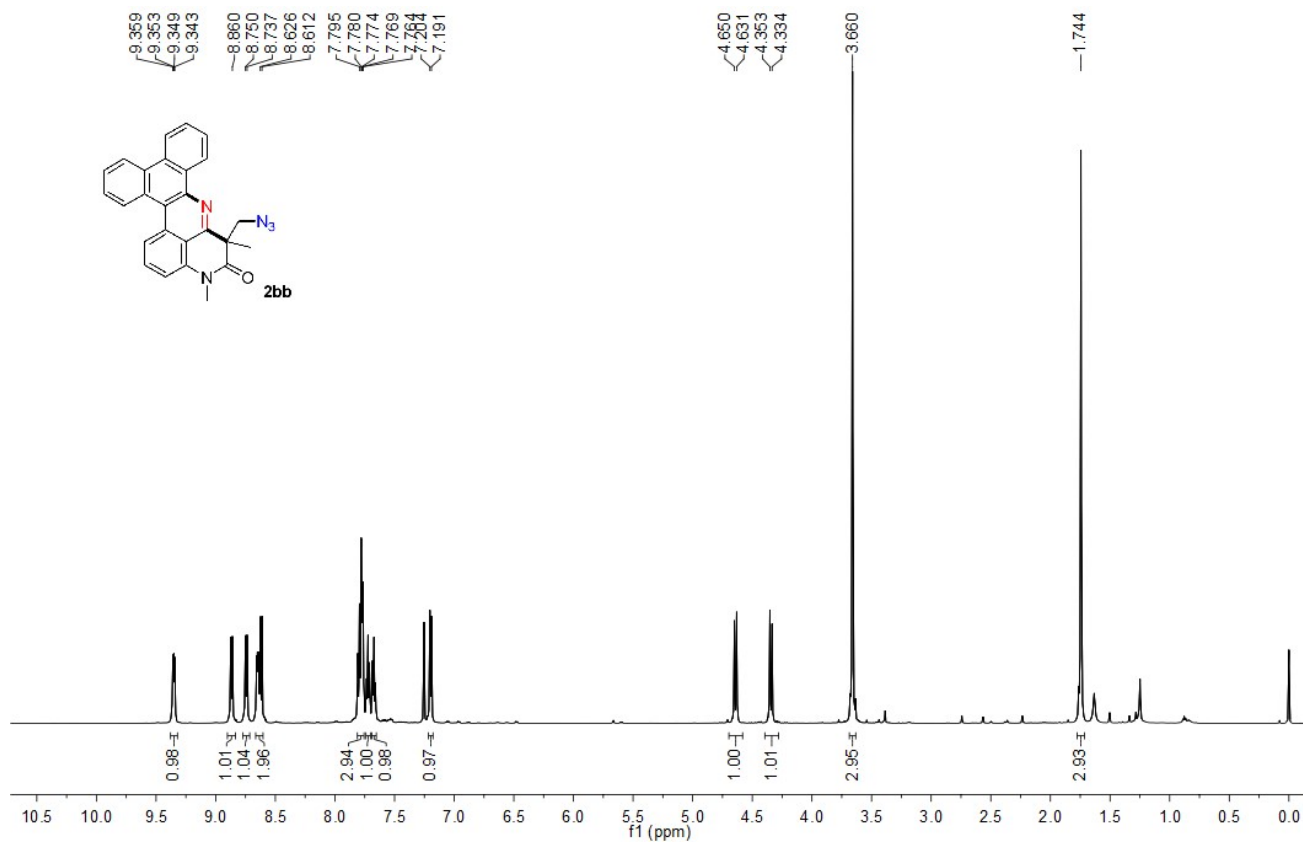

$^{13}\text{C}$  NMR (151 MHz,  $\text{CDCl}_3$ )

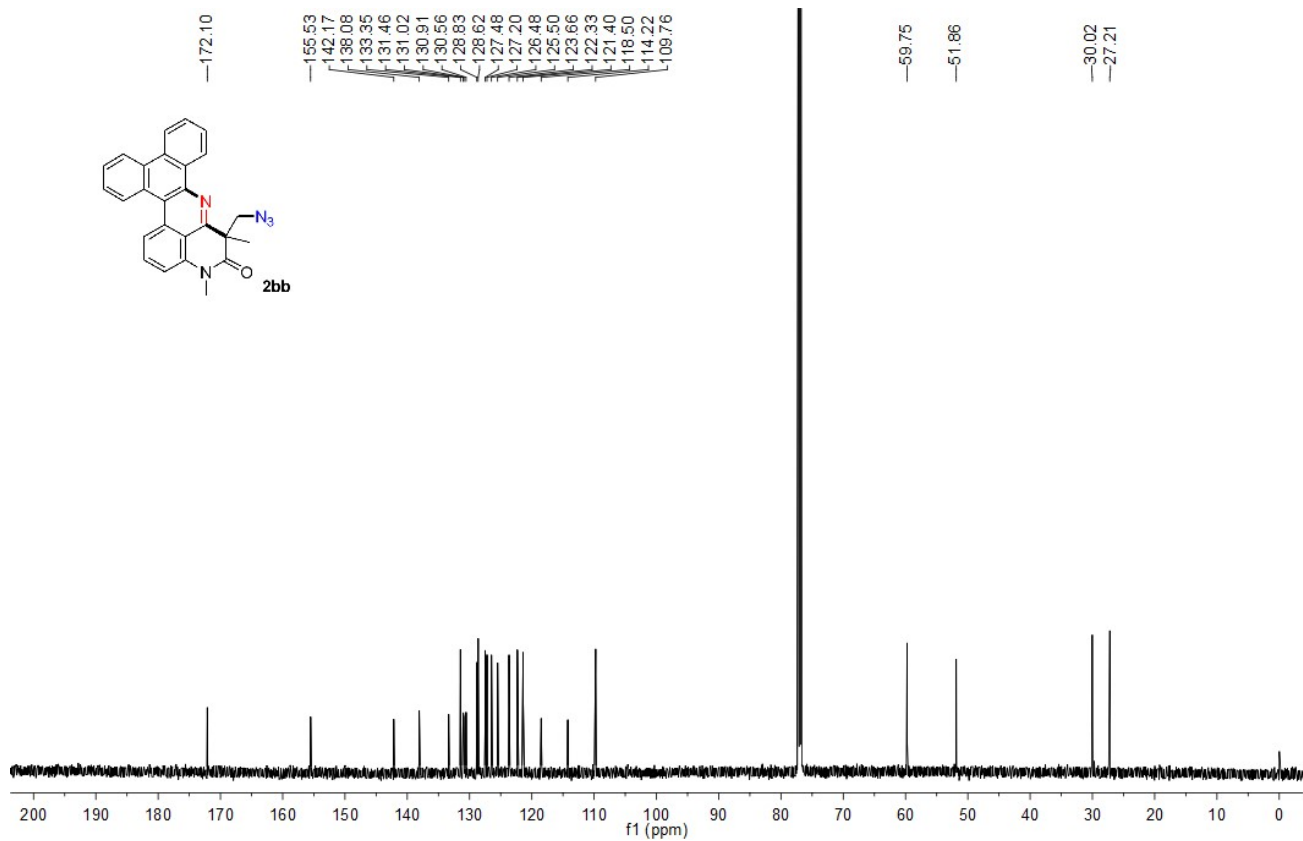

<sup>1</sup>H NMR, 600 MHz, CDCl<sub>3</sub>

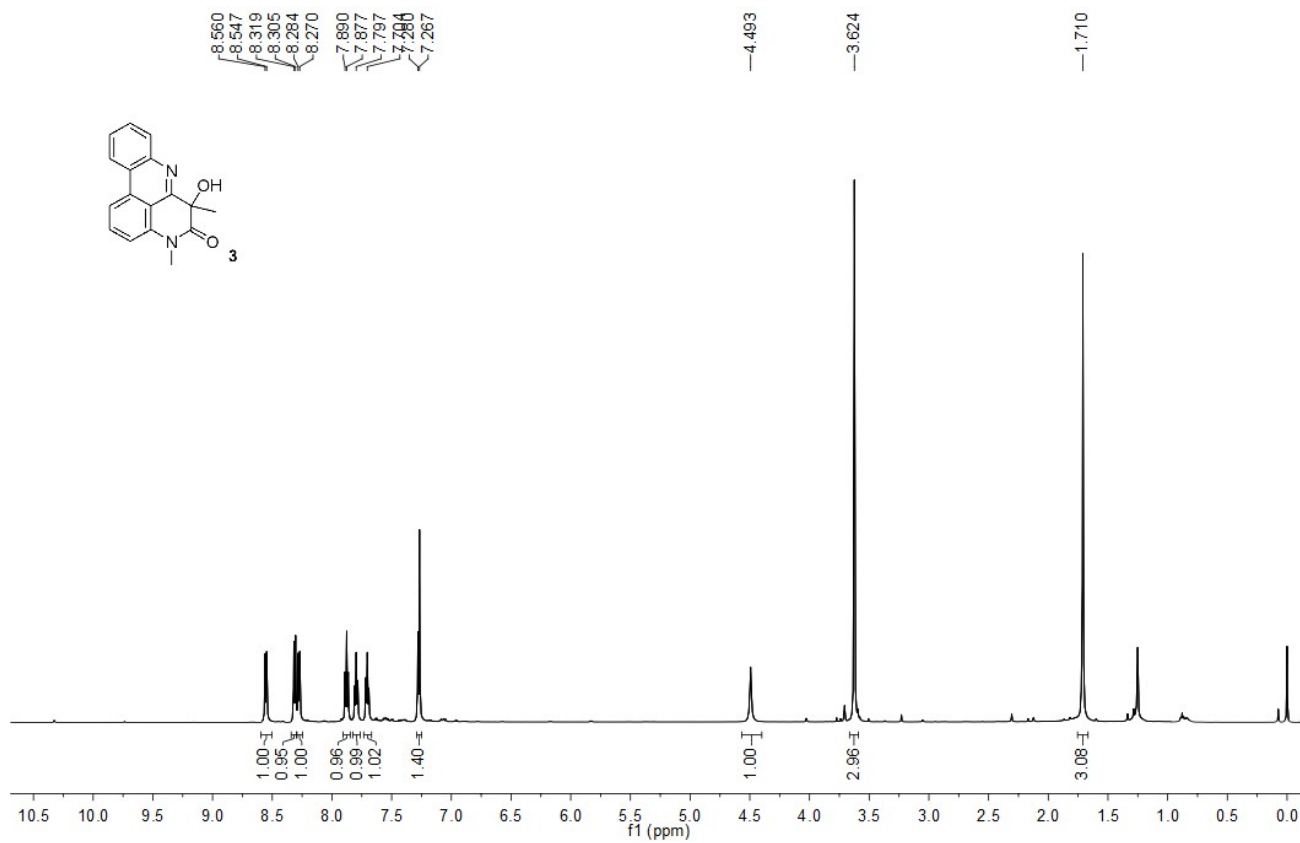

<sup>13</sup>C NMR (151 MHz, CDCl<sub>3</sub>)

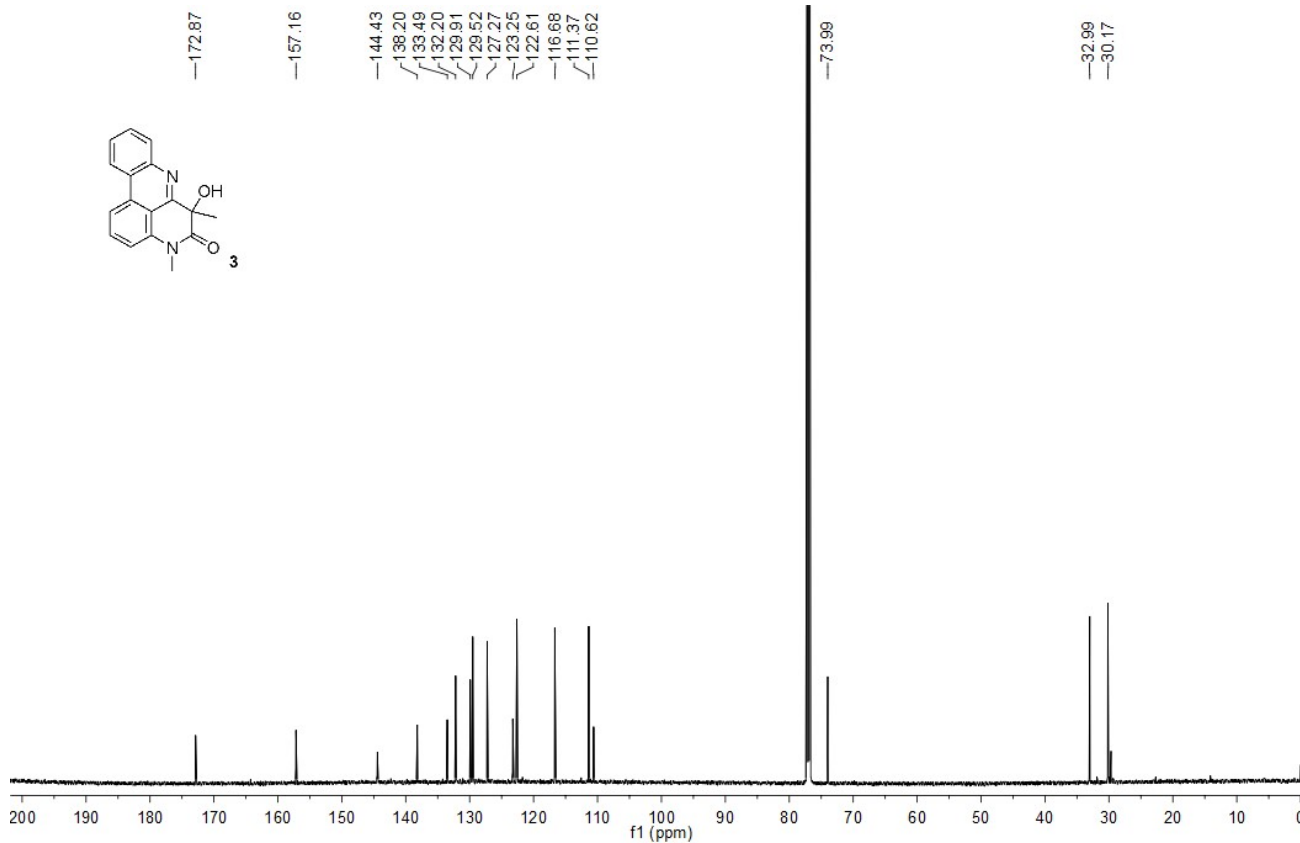

<sup>1</sup>H NMR, 600 MHz, CDCl<sub>3</sub>

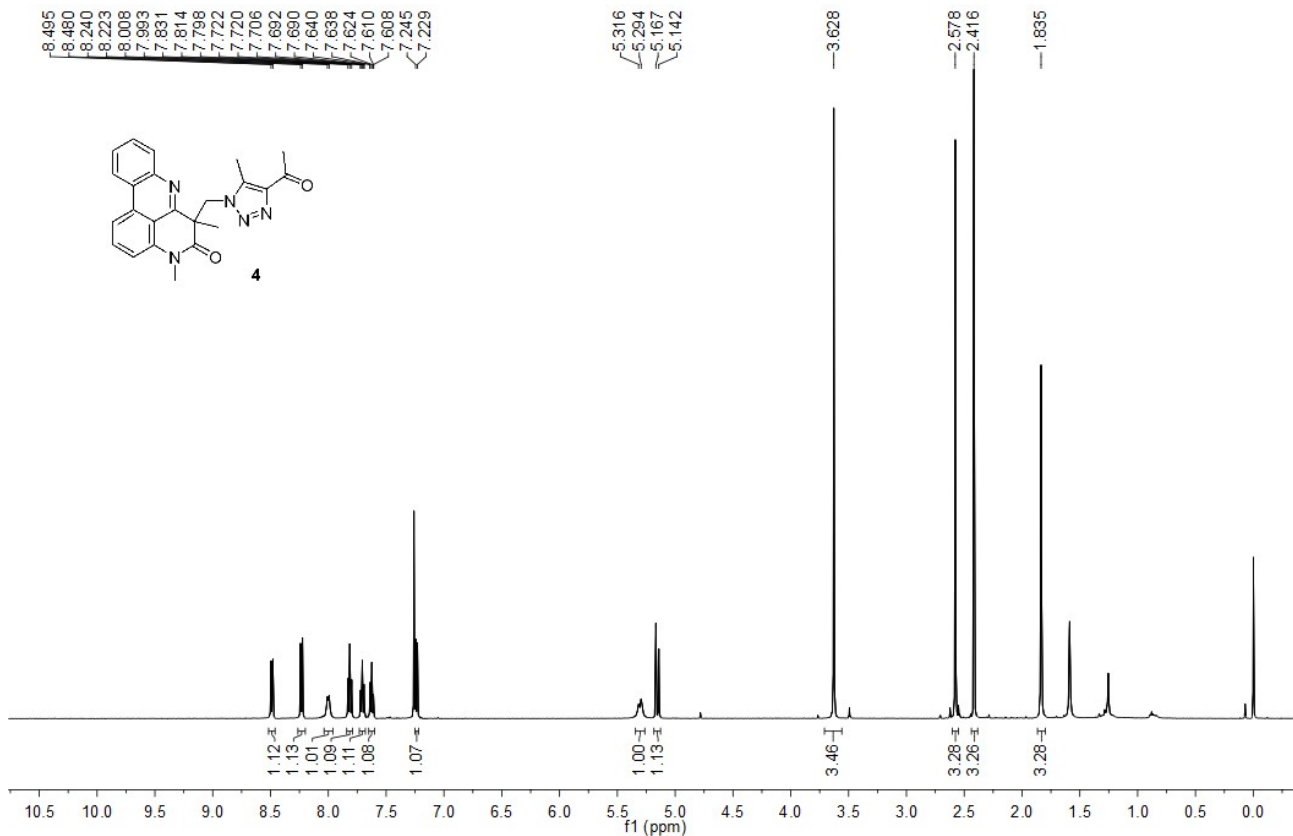

<sup>13</sup>C NMR (151 MHz, CDCl<sub>3</sub>)

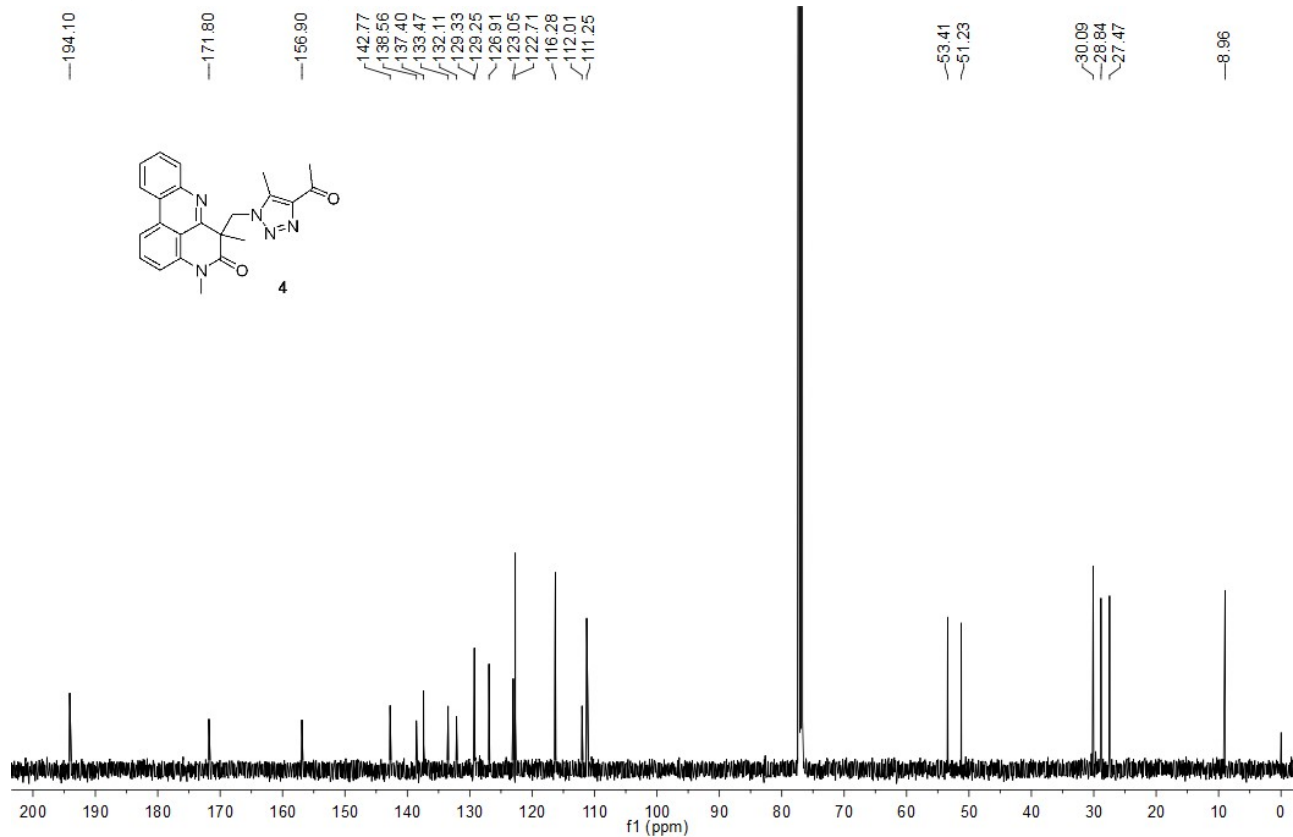

$^1\text{H}$  NMR, 600 MHz,  $\text{CDCl}_3$

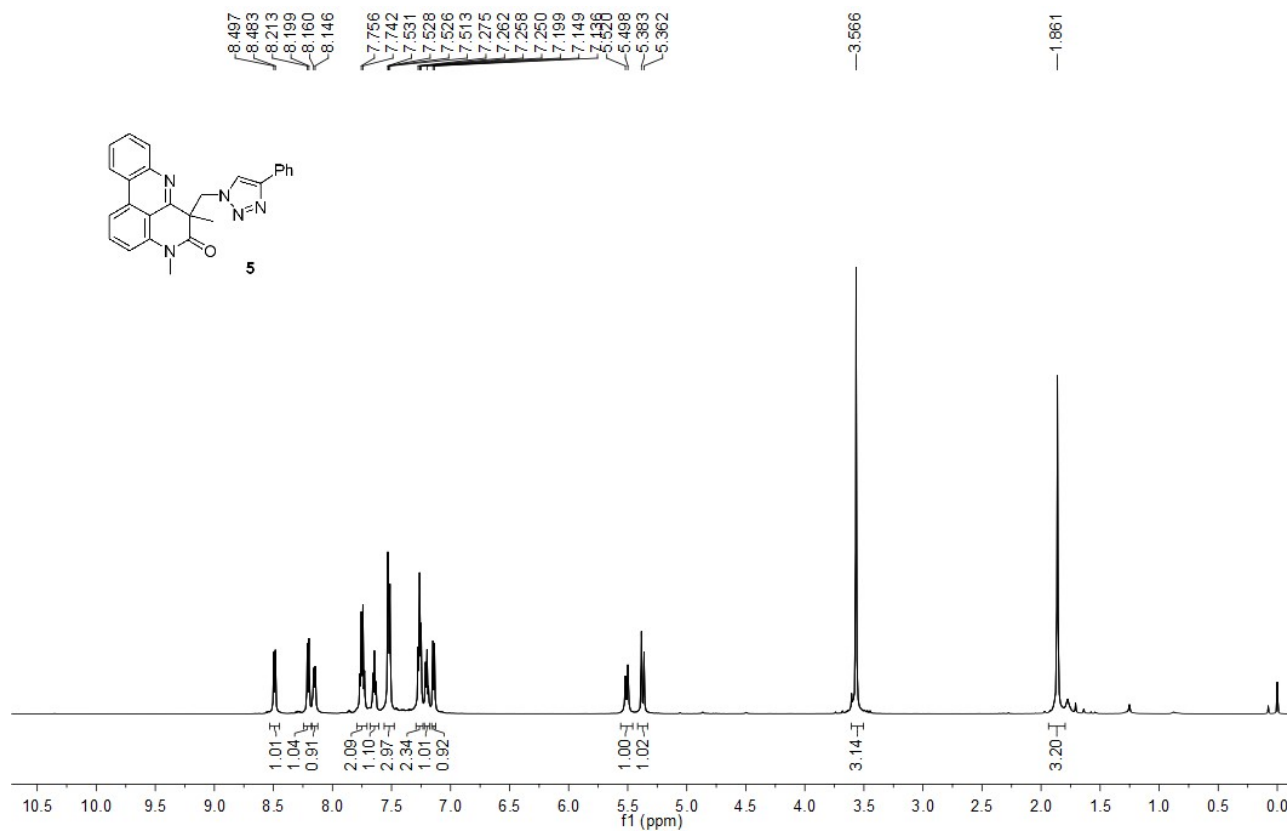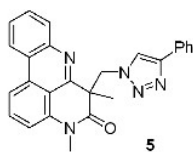

$^{13}\text{C}$  NMR (151 MHz,  $\text{CDCl}_3$ )

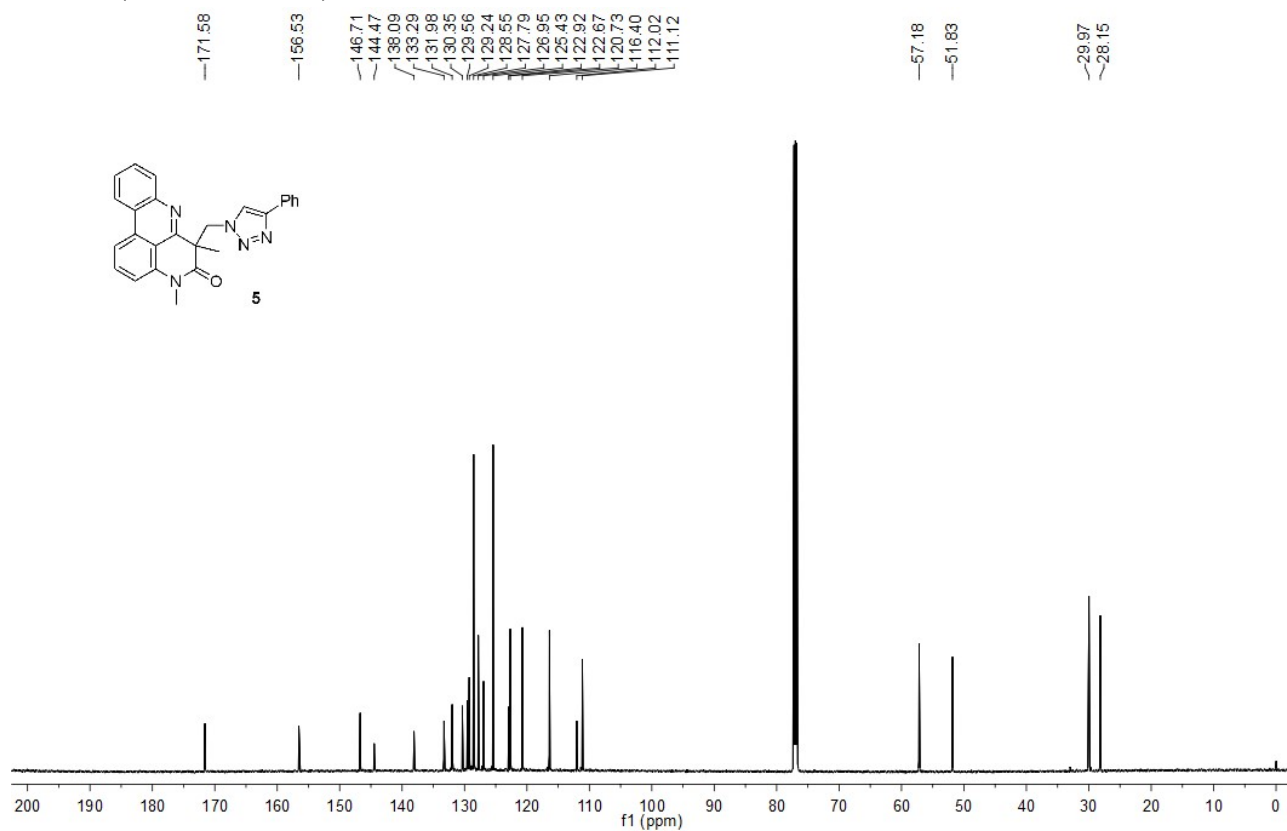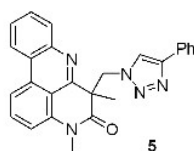

Supplement: d3ob01951a1.pdf [file d3ob01951a1.pdf]
